1 **TITLE**

2 Binary decision between asymmetric and symmetric cell division is defined by the balance of PAR  
3 proteins in *C. elegans* embryos

4

5 **AUTHORS**

6 Yen Wei Lim<sup>1,2</sup>, Fu-Lai Wen<sup>3,5</sup>, Prabhat Shankar<sup>3,5</sup>, Tatsuo Shibata<sup>3,\*</sup>, and Fumio Motegi<sup>1,2,4,6,\*</sup>

7

8 **AFFILIATIONS**

9 <sup>1</sup>Temasek Life-sciences Laboratory, Singapore 117604, Singapore.

10 <sup>2</sup>Department of Biological Sciences, National University of Singapore, Singapore 117583, Singapore.

11 <sup>3</sup>RIKEN Center for Biosystems Dynamics Research, Kobe 650-0047, Japan.

12 <sup>4</sup>Mechanobiology Institute, National University of Singapore, Singapore 117411, Singapore.

13 <sup>5</sup>These authors contributed equally.

14 <sup>6</sup>Lead contact.

15 \*Correspondence should be addressed to T.S. ([tatsuo.shibata@riken.jp](mailto:tatsuo.shibata@riken.jp)) or F.M. ([fmotegi@tll.org.sg](mailto:fmotegi@tll.org.sg)).

16

17 **ABSTRACT**

18 (150 words)

19 Coordination between cell differentiation and proliferation during development requires the balance  
20 between asymmetric and symmetric modes of cell division. However, the cellular intrinsic cue underlying  
21 the binary choice between these two division modes remains elusive. Here we show evidence in  
22 *Caenorhabditis elegans* that the invariable lineage of the division modes is programmed by the balance  
23 between antagonizing complexes of partitioning-defective (PAR) proteins. By uncoupling unequal  
24 inheritance of PAR proteins from that of fate determinants during zygote division, we demonstrated that  
25 changes in the balance between PAR-2 and PAR-6 are sufficient to re-program the division modes from  
26 symmetric to asymmetric and *vice versa* in two-cell stage embryos. The division mode adopted occurs  
27 independently of asymmetry in cytoplasmic fate determinants, cell-size asymmetry, and cell-cycle  
28 asynchrony between the sister cells. We propose that the balance between antagonizing PAR proteins  
29 represents an intrinsic self-organizing cue for binary specification of the division modes during  
30 development.

31

32 **KEYWORDS**

33 Cell polarity, Asymmetric cell division, Symmetric cell division, PAR proteins, *C. elegans*, Embryo

## 1 INTRODUCTION

2

3 The development of a multicellular organism requires strict control of the balance between cell  
4 proliferation and differentiation. Within a developing embryo, each cell proliferates via either asymmetric  
5 or symmetric mode of cell division (Horvitz and Herskowitz, 1992), yielding two daughter cells with either  
6 distinct or identical cellular constituents, respectively. The symmetric mode of cell division gives rise to  
7 two copies of the mother cell. The asymmetric mode of cell division results in unequal inheritance of fate  
8 determinants, which will promote the subsequent induction of distinct cellular fates between the daughter  
9 cells. A feature of asymmetric cell division can be accompanied by differences in cellular size between  
10 the daughter cells, although the cellular size asymmetry is not necessary for induction of distinct cellular  
11 fates during asymmetric cell division. The balance between asymmetric and symmetric modes of cell  
12 division is controlled during embryogenesis as well as during postnatal development. Many adult stem  
13 cells exhibit the homeostatic control of self-renewal and differentiation by balancing the two modes of  
14 cell division (Chen et al., 2016; Knoblich, 2008). Disruption of this balance results in developmental  
15 disorders, premature depletion of the stem cells, and abnormal growth of prenatal and postnatal organs.

16

17 The binary specification between asymmetric and symmetric modes of cell division is regulated by an  
18 intrinsic program (i.e., cell-autonomous manner) and by extrinsic stimuli that influence the intrinsic  
19 program (i.e., non-cell-autonomous manner). The resultant decision between the two division modes is  
20 thought to control the distribution of cell-polarity regulators, which in turn directs the spatial organization  
21 of the cell (Morrison and Kimble, 2006). Therefore, these cell-polarity regulators have been considered  
22 as passive effectors of the intrinsic cell-division program. To date, many machineries have been deemed  
23 essential for either symmetric or asymmetric mode of cell division. However, it has been challenging to  
24 obtain rigorous data identifying the nature of the intrinsic program used to impose the binary choice  
25 between the two division modes. Indeed, many arguments in support of an apparent intrinsic program  
26 have relied on circumstantial evidence, such as a combination of the mother cell polarity, spatial  
27 asymmetry in the external environment, and unequally sized daughter cells. Thus, the identity of the cue  
28 that dictates to the intrinsic cell-division program is not completely understood.

29 We investigated the intrinsic program underlying the binary specification between the two modes of cell  
30 division using the classic example of invariant cell-division lineage in *C. elegans* (Sulston and Horvitz,  
31 1977; Sulston et al., 1983). The newly-fertilized *C. elegans* zygote undergoes asymmetric cell division in  
32 a cell-autonomous manner, yielding two daughter cells, AB and P1 (Figure 1). During the first asymmetric  
33 cell division, the inner layer of the plasma membrane (i.e. the cell cortex) is compartmentalized via  
34 segregation of the conserved cell-polarity regulators, PAR proteins (Goldstein and Macara, 2007;  
35 Kemphues, 2000). PAR-3, PAR-6, atypical protein kinase C (aPKC), and the active form of Cdc42  
36 GTPase become enriched at the anterior cortex (Etemad-Moghadam et al., 1995; Hung and Kemphues,  
37 1999; Tabuse et al., 1998), whereas PAR-1 and PAR-2 localize at the posterior cortex (Boyd et al., 1996;  
38 Guo and Kemphues, 1995) (Figure 1). It has been widely accepted that cortical patterning of PAR

1 proteins is largely attributed to the principle of mutual inhibition, wherein proteins from one cortical  
2 domain antagonize the co-localization of proteins from the other domain and *vice versa* (Hoege and  
3 Hyman, 2013). These spatially-biased PAR proteins in turn segregate cytoplasmic fate determinants  
4 (e.g., MEX-5, PIE-1, and P-granules) and displace the mitotic spindle toward the posterior pole.  
5 Consequently, the two daughter cells comprise distinct concentration of fate determinants, cell size  
6 asymmetry and cell-cycle asynchrony (Griffin, 2015; Rose and Gonczy, 2014) (Figure 1). Displacement  
7 of the mitotic spindle and the consequent asymmetry in cellular size are not required to ensure the  
8 unequal inheritance of the fate determinants (Gotta and Ahringer, 2001; Gotta et al., 2003). In this study,  
9 asymmetric and symmetric modes of cell division were defined as the cellular ability to accomplish  
10 asymmetric segregation and unequal inheritance of both PAR proteins and fate determinants during  
11 mitosis.

12

13 The above-described cell polarity cascade in zygotes dictates the two daughter cells, AB and P1, to  
14 undergo symmetric and asymmetric cell division, respectively. During the second cell division, the  
15 polarized distributions of cortical PAR proteins and the cytoplasmic fate determinants are reiterated only  
16 in P1 cells, but not in AB cells (Figure 1). This commitment of AB and P1 cells to their respective mode  
17 of cell division occurs in a cell-autonomous manner (Priess and Thomson, 1987), indicating that the cue  
18 that dictates to the intrinsic cell-division program must be unequally inherited during the first cell division.  
19 AB and P1 cells also acquire differential abilities regarding the rotation of mitotic spindles. The AB spindle  
20 remains orthogonal to the anteroposterior axis, whereas the P1 spindle is rotated and aligned with the  
21 axis. In contrast to the cell-autonomous specification of the division modes, this rotation of mitotic  
22 spindles is directed by a combination of cell-autonomous manner [PAR proteins (Cheng et al., 1995;  
23 Kemphues et al., 1988) and microtubule-pulling forces (Kotak, 2019)] and non-cell-autonomous manner  
24 [the mid-body structure (Singh and Pohl, 2014) and a physical contact between AB and P1 cells (Sugioka  
25 and Bowerman, 2018)]. Still, the identity of the cue dictating the decision between symmetric and  
26 asymmetric modes of cell division in AB and P1 cells remains unclear.

27

28 In this report, we developed experimental systems that enabled independent assessment of the roles of  
29 PAR proteins and those of asymmetries in fate determinants, cell size and cell-cycle progression in two-  
30 cell stage embryos. Using genetic manipulations that uncoupled unequal inheritance of PAR proteins  
31 from that of the fate determinants during the first cell division, we demonstrated that changes in the  
32 balance between antagonizing PAR proteins are sufficient to re-program the cell division mode from  
33 symmetric to asymmetric and *vice versa* in two-cell stage embryos. Moreover, the specification of a cell  
34 division mode occurs independently of the unequal inheritance of fate determinants, cell size asymmetry,  
35 and cell-cycle asynchrony between the sister cells. Therefore, we propose that the balance between  
36 PAR proteins represents an intrinsic self-organizing cue for binary specification regarding the cell-  
37 division modes.

38

## 1 RESULTS

### 2 Manipulation of PAR protein inheritance during the first cell division

3

4 To isolate the roles of PAR proteins from those of other asymmetric features in the specification of the  
5 two division modes, we sought to control the amount of PAR proteins in AB and P1 cells without affecting  
6 asymmetries in the fate determinants, cellular size, and cell-cycle progression in two-cell stage embryos.  
7 From the one-cell to the two-cell stage, transcriptional and translational regulation generally remains  
8 quiescent (Seydoux and Dunn, 1997; Seydoux et al., 1996). Accordingly, conventional transgene-based  
9 approaches cannot be used for the efficient manipulation of the levels and activities of PAR proteins from  
10 the onset of the second cell division. Therefore, we attempted to modify the PAR protein levels in AB and  
11 P1 cells by manipulating inheritance of PAR proteins during the first cell division. The prevailing model  
12 of PAR protein patterning involves reciprocal exclusion at the cortex, wherein the cortical concentration  
13 of each protein is determined by the spatially-biased rates of cortical association and disassociation in  
14 the respective domains (Blanchoud et al., 2015; Cuenca et al., 2003; Dawes and Munro, 2011; Goehring  
15 et al., 2011; Hoege and Hyman, 2013). The expansion of one cortical PAR domain is antagonized not  
16 only by the opposing PAR proteins but also by a limiting pool of maternally-supplied PAR proteins  
17 (Goehring et al., 2011). We thus attempted to modify the levels of specific PAR proteins in zygotes by  
18 altering the corresponding maternal supplies.

19

20 We first manipulated the maternal supplies of PAR-2 and PAR-6 via transgene expressions in germline.  
21 The germline expression of GFP::PAR-2 rescued the polarized distribution of mCherry::PAR-6 in *par-*  
22 *2(ok1723)* zygotes from which endogenous *par-2* had been deleted (Figures 2A and 2B). The germline  
23 expression of mCherry::PAR-6 restored the polarized localization of GFP::PAR-2 in *par-6(3' UTR RNAi)*  
24 zygotes (Figure S1A). The germline levels of GFP::PAR-2 were modified by adapting the codon usage  
25 in the *gfp::par-2* transgene (Goehring et al., 2011; Redemann et al., 2014). A stepwise increase in the  
26 transgene codon-adaptation-index (CAI) from 0.26 to 0.60 resulted in a progressive increase in the  
27 cytoplasmic intensities of GFP::PAR-2 in zygotes (Figure S1B). Consistent with a previous report  
28 (Goehring et al., 2011), zygotes overexpressing *gfp::par-2* transgenes exhibited enlarged posterior PAR-  
29 2 domains compared with the control zygotes (Figures 2A and 2C). These enlarged posterior PAR-2  
30 domains were restored to a normal size by the co-expression of mCherry::PAR-6 (Figures 2A and 2C).  
31 These results indicate that changes in the balance between PAR-2 and PAR-6 are sufficient to alter the  
32 size of the cortical PAR domains in zygotes. We then established a set of stable transgenic animals  
33 expressing various combinations of *gfp::par-2* transgenes (in the *par-2(ok1723)* background) and  
34 *mCherry::par-6* transgene (in the presence of endogenous *par-6*). These transgenes were combined  
35 with additional genetic mutation, either *lgl-1(dd21)* or *nos-3(q650)*, which respectively increases or  
36 reduces the level of maternally-supplied endogenous PAR-6 (Beatty et al., 2010; Hoege et al., 2010;  
37 Pacquelet et al., 2008). We then measured the sizes of the anterior cortical domain (mCherry::PAR-6)

1 and the posterior cortical domain (GFP::PAR-2) in these zygotes at the steady state (i.e., during the  
2 maintenance phase).

3

4 We first examined the patterns of cortical PAR domains in zygotes with a predominance of PAR-6. A  
5 stepwise reduction in the level of GFP::PAR-2 led to a progressive decrease in the size of the posterior  
6 PAR-2 domain (Figures 2A and 2C) and in a reciprocal increase in the size of the anterior PAR-6 domain  
7 (Figure S1C). The various sizes of the cortical PAR domains were converted to a consistent size (82%  
8 and 18% of the mCherry::PAR-6 and GFP::PAR-2 domains, respectively) by applying the same genetic  
9 treatment that enabled the predominance of PAR-6 (i.e., simultaneous increase in PAR-6 and decrease  
10 in GFP::PAR-2 levels) (Figures 2A and 2C). Any further reduction in the GFP::PAR-2 levels via partial *par-*  
11 *2(RNAi)* treatment [*par-2(pRNAi)*] led to the disappearance of the GFP::PAR-2 domain from the posterior  
12 cortex (Figures 2B, 2C, 2E, S1E, and S1G). We confirmed that the *par-2(pRNAi)* treatment did not  
13 completely eliminate GFP::PAR-2 from these zygotes, as indicated by the GFP::PAR-2 accumulation at  
14 the cell-cell contact in two-cell stage embryos. These observations suggest that the minimum size of the  
15 cortical PAR-2 domain is maintained by a threshold. Especially, the establishment of the posterior PAR  
16 domain exhibits a bi-stable switch-like characteristic, wherein the polarized state (i.e., the co-existent  
17 polarized PAR-6 and PAR-2 domains) can abruptly shift to an unpolarized state (i.e., homogeneous PAR-  
18 6 domain and no PAR-2 domain) if the posterior PAR domain size falls below the threshold.

19

20 We next applied a stepwise increase in the GFP::PAR-2 levels and reduction in the PAR-6 levels to yield  
21 zygotes in which PAR-2 is predominant. Remarkably, simultaneous increase in GFP::PAR-2 and  
22 decrease in PAR-6 levels caused the distribution of GFP::PAR-2 to extend into the anterior cortex, where  
23 mCherry::PAR-6 remained significantly enriched (Figures 2A, 2B, 2D, 2F, S1D, S1F, and S1H). A live-  
24 imaging analysis revealed that the boundary of the cortical mCherry::PAR-6 domain co-migrated with  
25 the posterior-to-anterior movement of cortical ruffling, whereas GFP::PAR-2 was seen throughout the  
26 cortex (Figures S2C, S2F, and S3). These results indicate that the PAR system appears to permit the co-  
27 existence of an anteriorly-polarized PAR-6 domain with a PAR-2 domain throughout the cortex. This  
28 violation of the reciprocal exclusion between the anterior and the posterior PAR domains cannot be  
29 explained by the conventional models of cortical PAR patterning, wherein the anterior group of proteins  
30 (PAR-3, PAR-6, PKC-3, and Cdc42) and the posterior group of proteins (PAR-1 and PAR-2) are  
31 segregated throughout the polarization processes (Blanchoud et al., 2015; Dawes and Munro, 2011;  
32 Goehring et al., 2011).

33

#### 34 **Maintenance of polarized PAR domains via a combinatorial network of two reciprocal exclusion** 35 **pathways**

36

37 To understand how PAR-6 remains polarized in the absence of reciprocal exclusion with PAR-2, we  
38 investigated the distributions of other PAR proteins. In zygotes with a PAR-2 predominance, the polarized  
39 mCherry::PAR-6 domain was maintained, while GFP::PAR-2 and endogenous PAR-1 were localized

1 throughout the cortex (Figures 3A-3D and S3A). However, endogenous PAR-3 was significantly  
2 minimized or was undetectable at the anterior cortex (Figures 3A, 3E, and S3B), suggesting that the  
3 polarized state of PAR-6 is maintained independently of cortical PAR-3 loading. PAR-3 is considered as  
4 a cortical scaffold that locally recruits PAR-6 and PKC-3 to the active form of CDC-42 at the anterior  
5 cortex (Rodriguez et al., 2017; Wang et al., 2017). Despite the essential functions of PAR-3 in wild-type  
6 zygotes, PAR-3 becomes dispensable for the cortical loading of PAR-6 and PKC-3 in zygotes depleted  
7 of the Hsp90 co-chaperone CDC-37 (Beers and Kemphues, 2006), suggesting another scaffold for PAR-  
8 6 and PKC-3. Because PAR-6 contains a CRIB domain that directly associates with the active form of  
9 CDC-42 (Aceto et al., 2006; Joberty et al., 2000), we hypothesized that active CDC-42 recruits PAR-6  
10 directly to the anterior cortex in a manner independent on both cortical PAR-3 loading and antagonism  
11 between PAR-2 and PAR-6. To test this hypothesis, we altered the asymmetric distribution of active CDC-  
12 42 by depleting the CDC-42 GTPase-activating protein, CHIN-1. CHIN-1 localizes at the posterior cortex  
13 independently of other posterior PAR proteins, and restricts CDC-42 activation only at the anterior cortex  
14 (Kumfer et al., 2010; Sailer et al., 2015). In this study, the depletion of CHIN-1 from PAR-2-predominant  
15 zygotes did not affect the initial segregation of mCherry::PAR-6 toward the anterior cortical domain.  
16 However, these zygotes failed to maintain the anteriorly-enriched mCherry::PAR-6 domain after the  
17 cessation of cortical flows (Figures 3F, 3G, and S3C). Therefore, we conclude that the polarized state of  
18 PAR-6 is maintained by the accumulation of active CDC-42 at the anterior cortex through a process  
19 mediated by CHIN-1.

20

21 The above results suggest that the polarized cortical PAR domains can be maintained by an inter-  
22 connected network involving two reciprocal exclusion pathways (Figure 4A). One pathway depends on  
23 the interactions among PAR-3–PKC-3–PAR-6 at the anterior cortex and between PAR-1–PAR-2 at the  
24 posterior cortex. In this pathway, antagonistic phosphorylation between the two complexes contributes  
25 to reciprocal cortical exclusion. The other pathway relies on interactions among CDC-42–PAR-6–PKC-3  
26 at the anterior cortex and CHIN-1 at the posterior cortex. Here PKC-3 excludes CHIN-1 from the anterior  
27 cortex via an unidentified mechanism, whereas CHIN-1 inactivates and excludes CDC-42 from the  
28 posterior cortex. In contrast to our revised model, the conventional model of cortical PAR network  
29 includes only one reciprocal exclusion pathway involving PAR-3–PKC-3–PAR-6–CDC-42 at the anterior  
30 cortex and PAR-1–PAR-2 at the posterior cortex (Blanchoud et al., 2015; Dawes and Munro, 2011;  
31 Goehring et al., 2011; Gross et al., 2019). A recent study proposed an inter-connected network  
32 comprising PAR-3–PKC-3–PAR-6–CDC-42 at the anterior cortex and PAR-1–PAR-2 and CHIN-1 at the  
33 posterior cortex (Sailer et al., 2015). However, the earlier models assumed that PAR-3 is essential for the  
34 local recruitment and maintenance of PAR-6 at the anterior cortex (Blanchoud et al., 2015; Dawes and  
35 Munro, 2011; Goehring et al., 2011; Gross et al., 2019; Sailer et al., 2015), and therefore cannot explain  
36 the maintenance of the polarized PAR-6 domain even in the absence of cortical PAR-3 loading.

37

38 **Simulation of PAR patterning in zygotes**

1

2 To test if the inter-connected PAR network involving two reciprocal exclusion pathways would sufficiently  
3 explain the PAR patterning in zygotes with manipulated PAR balances, we developed a mathematical  
4 model of PAR patterning network. Previous studies simulated only a sub-circuit involving one reciprocal  
5 cortical-exclusion pathway either between PAR-3–PKC-3–PAR-6 and PAR-1–PAR-2 (Blanchoud et al.,  
6 2015; Dawes and Munro, 2011; Goehring et al., 2011) or between PKC-3–PAR-6–CDC-42 and CHIN-1  
7 (Sailer et al., 2015). We developed a model in which the anterior cortical domain contains two species,  
8  $A_1$  [CDC-42–PAR-6–PKC-3] and  $A_2$  [PAR-3–PAR-6–PKC-3], and the posterior cortical domain includes  
9 two species,  $P_1$  [CHIN-1] and  $P_2$  [PAR-1–PAR-2] (Figure 4A). We included four inhibitory interactions:  
10 from  $A_1$  [CDC-42–PAR-6–PKC-3] to  $P_2$  [PAR-1–PAR-2], from  $P_2$  [PAR-1–PAR-2] to  $A_2$  [PAR-3–PAR-6–  
11 PKC-3], from  $A_1$  [CDC-42–PAR-6–PKC-3] to  $P_1$  [CHIN-1], and from  $P_1$  [CHIN-1] to  $A_1$  [CDC-42–PAR-6–  
12 PKC-3] (Figure 4A). As PAR-3 facilitates the cortical recruitment of PAR-6–PKC-3 during the early stage  
13 of polarization, we also included a positive interaction from  $A_2$  [PAR-3–PAR-6–PKC-3] to  $A_1$  [CDC-42–  
14 PAR-6–PKC-3] (Figure 4A). A steady-state analysis of the four PAR species in a wild-type condition  
15 revealed the enrichment of  $A_1$  [CDC-42–PAR-6–PKC-3] and  $A_2$  [PAR-3–PAR-6–PKC-3] at the anterior  
16 cortex and that of  $P_1$  [CHIN-1] and  $P_2$  [PAR-1–PAR-2] at the posterior cortex (Figure 4B). Subsequent  
17 simulation wherein the concentration of  $A_1$  [CDC-42–PAR-6–PKC-3] (Figure 4C),  $P_2$  [PAR-1–PAR-2]  
18 (Figure 4D), or  $P_1$  [CHIN-1] (Figure 4E) were reduced to zero reproduced the PAR patterns observed in  
19 zygotes where either PAR-6, PAR-2, or CHIN-1 had been depleted by RNAi (Figures 4C-4E). Therefore,  
20 this model confirms the essential roles of PAR-2 and PAR-6 and a non-essential role of CHIN-1 in a wild-  
21 type background. A reduction in the total concentration of  $P_2$  [PAR-1–PAR-2] reduced the size of the  $P_2$   
22 [PAR-1–PAR-2] domain and shifted the anterior-posterior boundary to the posterior pole (Figure 4F). In  
23 contrast, a decrease in the total concentration of  $A_1$  [CDC-42–PAR-6–PKC-3] enlarged the size of the  $P_2$   
24 [PAR-1–PAR-2] domain and shifted the anterior-posterior boundary to the anterior pole (Figure 4G).  
25 Further overexpression of  $P_2$  [PAR-1–PAR-2] induced a bifurcation characterized by high and low cortical  
26 concentration of  $P_2$  [PAR-1–PAR-2] and  $A_2$  [PAR-3–PAR-6–PKC-3], respectively, throughout the cortex,  
27 while maintaining an anteriorly-enriched  $A_1$  [CDC-42–PAR-6–PKC-3] domain (Figure 4H). At the  
28 bifurcation point where  $P_2$  [PAR-1–PAR-2] localizes throughout the cortex, a reduction in  $P_1$  [CHIN-1] led  
29 to depolarization of the anterior  $A_1$  [CDC-42–PAR-6–PKC-3] domain (Figure 4I), indicating the  
30 requirement for CHIN-1 to maintain a polarized PAR-6 domain. Thus, our simulation based on the inter-  
31 connected network involving two reciprocal exclusion pathways could recapitulate the PAR patterning  
32 in zygotes subjected to manipulation of the balance between PAR proteins. These analyses reveal that  
33 the combinatorial network maintains the polarization of PAR-6 independently of reciprocal exclusion  
34 between PAR-2 and PAR-6 in zygotes.

35

1 **Reciprocal exclusion of PAR proteins is not essential for unequal inheritance of fate determinants**

2

3 We next investigated whether a state maintaining an anteriorly-polarized PAR-6 domain in the absence  
4 of reciprocal exclusion between PAR-2 and PAR-6 would yield unequal inheritance of fate determinants  
5 during the first cell division. The zygotes with manipulated PAR balances were categorized into three  
6 classes based on the distribution patterns of both GFP::PAR-2 and cytoplasmic factors including the fate  
7 determinants (P-granules and MEX-5) and the position of a cleavage furrow (specified by the position of  
8 the mitotic spindle) (see Figure 5 legend for the definition of the three phenotypic classes). More than  
9 half of the zygotes with a predominance of PAR-2 (GFP::PAR-2<sup>CAI = 0.60</sup>; mCherry::PAR-6, *par-6(pRNAi)*  
10 for 9 hours) localized GFP::PAR-2 throughout the cortex but exhibited the accumulation of PGL-1-positive  
11 P-granules within the posterior cytoplasm (class II zygotes in Figures 5A, 5B, and 5E). Although these  
12 zygotes contained fewer P-granules than wild-type zygotes, these granules were polarized toward the  
13 posterior cortex when compared to zygotes that severely depleted of PAR-6 (GFP::PAR-2<sup>CAI = 0.60</sup>;  
14 mCherry::PAR-6, *par-6(RNAi)* for 24 hours) (Figure 5A). These PAR-2-predominant zygotes also  
15 established a gradient of MEX-5 enriched within the anterior cytoplasm (class II zygotes in Figures 5A,  
16 5C, and 5F). The mitotic spindles were displaced toward the posterior cortex, resulting in a cleavage  
17 furrow positioned toward the posterior pole (class II zygotes in Figures 5A, 5D, and 5G). Both  
18 manipulated and control embryos retained cell-cycle asynchrony between AB and P1 cells in two-cell  
19 stage embryos (Figures 6A and S6A). These observations suggest that these asymmetries between AB  
20 and P1 cells were established independently of reciprocal cortical exclusion between PAR-2 and PAR-  
21 6 during the first cell division.

22

23 **The balance between antagonizing PAR proteins defines the binary specification of the division modes**  
24 **in two-cell stage embryos**

25

26 Genetic manipulation of the PAR balances enabled us to establish the PAR-2-predominant zygotes,  
27 wherein the cortical pattern of PAR proteins was uncoupled from the segregation of fate determinants  
28 and the mitotic spindle displacement during the first cell division. Therefore, we were able to test whether  
29 these manipulations in the PAR protein levels would affect the specification of the division modes in AB  
30 and P1 cells, while ensuring the correct asymmetries in fate determinants, cell size, and cell-cycle  
31 progression between these sister cells. The invariant lineage of *C. elegans* dictates the commitment of  
32 AB and P1 cells to the symmetric and asymmetric modes of cell division, respectively. In control embryos  
33 expressing normal levels of PAR-6 and PAR-2, the AB cells localized mCherry::PAR-6 and PAR-3  
34 throughout the cortex and GFP::PAR-2 and MEX-5 within the cytoplasm, leading to equal inheritance of  
35 PAR proteins (GFP::PAR-2, mCherry::PAR-6, and PAR-3) and fate determinants (P-granules, MEX-5, and  
36 PIE-1) between the two daughter cells (Figures 6A-6D). PAR-2-predominant AB cells exhibited  
37 overlapping distributions of mCherry::PAR-6 and GFP::PAR-2 throughout the cortex during early  
38 prophase (Figure 6A). Subsequently, mCherry::PAR-6 and GFP::PAR-2 began to polarize into two distinct  
39 cortical domains, resulting in unequal inheritance of GFP::PAR-2 and mCherry::PAR-6 between the two



1 daughter cells (Figures 6A, 6B, and S6A). The orientation of the PAR-6 and PAR-2 cortical domains  
2 occurred randomly with respect to the contact between AB and P1 (Figure S6C), suggesting that the  
3 PAR patterning is not instructed by the cell-cell contact. The polarization pattern of GFP::PAR-2 and  
4 mCherry::PAR-6 in AB cells was strongly associated with the polarization of PAR-1 and PAR-3 to their  
5 respective cortical domains. Remarkably, the PAR-2-predominant AB cells partitioned cytoplasmic MEX-  
6 5 and PIE-1 toward the mCherry::PAR-6 domain and the GFP::PAR-2 domains, respectively (Figures 6C,  
7 6D, and S7), indicating that the polarized PAR domains are able to induce the asymmetric mode of AB  
8 cell division. During anaphase, mitotic spindle rotation was not detectable in AB cells in which both  
9 GFP::PAR-2 and mCherry::PAR-6 were polarized (Figures 6A and S6C). In contrast to AB cells, P1 cells  
10 from the same embryos exhibited uniformly distributed GFP::PAR-2 at the cortex and mCherry::PAR-6 in  
11 the cytoplasm, resulting in the symmetric mode of P1 cell division (Figures 6A-6C, S6, and S7). We thus  
12 conclude that when other relevant factors are controlled, the manipulation of PAR protein levels is  
13 sufficient to reverse the specification of the division modes between AB and P1 cells.

14

15 To further test whether changes in the balance of PAR proteins could sufficiently induce asymmetric  
16 mode of AB cell division, we characterized other mutant embryos in which PAR-1 and PAR-2 had been  
17 inherited equally between AB and P1 cells. In a zygote, mutual exclusion between the anterior and the  
18 posterior PAR domains requires CDC-37 (Beers and Kemphues, 2006). Here, *cdc-37(RNAi)* treatment  
19 induced overlapping cortical distributions of mCherry::PAR-6 and GFP::PAR-2, and the symmetric  
20 distributions of MEX-5 and P-granules during the first cell division (Figures S4A and S4C-S4E). Notably,  
21 higher levels of GFP::PAR-2<sup>CAI = 0.60</sup>, but not moderate levels of GFP::PAR-2<sup>CAI = 0.40</sup>, induced the  
22 asymmetric segregation of GFP::PAR-2, PAR-1, PAR-3, MEX-5, and PIE-1 in AB cells of two-cell stage  
23 *cdc-37(RNAi)* embryos (Figures 6A-6D, S6A, and S7). These results further confirmed that a change in  
24 the PAR protein balance can sufficiently reverse the selection of the division modes between AB and P1  
25 cells.

26

27 Next, we investigated whether an optimum level of PAR proteins would enable the asymmetric mode of  
28 cell division in both sister cells that had equally inherited fate determinants during the first cell division.  
29 Here we aimed to verify whether the specification of the division modes in AB and P1 cells was truly  
30 independent of the unequal inheritance of fate determinants and asymmetries in cell size and cell-cycle  
31 progression. Using RNAi to deplete cyclin-E (CYE-1) that prevented the polarization of PAR proteins via  
32 a failure of centrosome-mediated polarization in zygotes (Cowan and Hyman, 2006), we observed the  
33 equal inheritance of PAR proteins (mCherry::PAR-6, GFP::PAR-2, and PAR-3) and fate determinants  
34 (MEX-5, PIE-1, and P-granules) during the first cell division (Figures S5B, S5C, S5E, and S5F). Moreover,  
35 both daughter cells exhibited equal sizes and synchronized cell-cycle progression (Figures 7A and S6B).  
36 In two-cell stage *cye-1(RNAi)* embryos expressing lower levels of GFP::PAR-2<sup>CAI = 0.26</sup>, both cells equally  
37 inherited GFP::PAR-2 during mitosis (Figures 7A and 7B). Remarkably, in two-cell stage *cye-1(RNAi)*  
38 embryos expressing higher levels of GFP::PAR-2<sup>CAI = 0.40</sup>, both cells segregated GFP::PAR-2 to the polar  
39 cortex. Consequently, GFP::PAR-2 was inherited unequally by one daughter cell during the second cell

1 division (Figures 7A, 7B, and S6B). The polarized distribution of PAR-2 was strongly associated with the  
2 segregation of PAR-3 into the respective cortical domain, of MEX-5 in the cytoplasm opposite to the  
3 GFP::PAR-2 domain, and of PIE-1 and P-granules toward the GFP::PAR-2 domain (Figures 7C, 7D, and  
4 S7). The polarized distribution of PAR proteins in two-cell stage embryos was often associated with the  
5 rotation of mitotic spindles toward the cell-cell contact site (Figure S6C). Therefore, we conclude that the  
6 selected mode of cell division in two-cell stage embryos is completely independent of the unequal  
7 inheritance of fate determinants, cell-size asymmetry and cell-cycle asynchrony between the sister cells.  
8 Our findings support a model that the balance between antagonizing PAR proteins is the critical intrinsic  
9 cue for binary specification regarding the asymmetric or symmetric mode of cell division.

10

### 11 **Simulation of PAR patterning in two-cell stage embryos**

12

13 To test if the binary specification of the division mode in two-cell stage embryos can be explained by  
14 unequal inheritance of the balance between antagonizing PAR proteins, we applied a mathematical  
15 model of the aforementioned PAR network to two-cell stage embryos (Figures 8A-8E). We performed  
16 steady-state analysis of the four PAR species distribution in AB and P1 cells, which are derived from  
17 wild-type zygotes or the zygotes with a predominance of PAR-2 (Class II zygotes in Figure 5). Inheritance  
18 of the PAR species between AB and P1 cells and their initial distribution in AB and P1 cells were defined  
19 by their steady-state distribution in zygotes (Figures 4 and 8A). These PAR species were partitioned at  
20 the position of cleavage furrow measured in zygotes ( $56.1 \pm 1.6\%$  in wild-type zygotes, and  $54.8 \pm 2.3\%$   
21 in PAR-2-predominant zygotes) (Figures 5 and 8A).

22

23 Wild-type zygotes partitioned the PAR species unequally into two daughter cells. AB cells inherited  
24 higher concentration of  $A_1$  [CDC-42-PAR-6-PKC-3] and  $A_2$  [PAR-3-PAR-6-PKC-3] and lower  
25 concentration of  $P_1$  [CHIN-1] and  $P_2$  [PAR-1-PAR-2] (Figure 8B). The total concentration of the PAR  
26 species in P1 cells was determined according to the law of mass conservation (Figure 8B). In wild-type  
27 two-cell stage embryos, AB cells exhibited symmetric distribution of all PAR species, while P1 cells  
28 segregated them into two distinct cortical domains (Figure 8C). In contrast to wild-type zygotes, PAR-2-  
29 predominant zygotes underwent almost-equal inheritance in  $A_2$  [PAR-3-PAR-6-PKC-3] and  $P_2$  [PAR-1-  
30 PAR-2], while keeping unequal inheritance in  $A_1$  [CDC-42-PAR-6-PKC-3] and  $P_1$  [CHIN-1] into two  
31 daughter cells (Figure 8D). In PAR-2-predominant two-cell stage embryos, AB cells segregated  $A_1$  [CDC-  
32 42-PAR-6-PKC-3] and  $A_2$  [PAR-3-PAR-6-PKC-3] at the anterior cortex and  $P_1$  [CHIN-1] and  $P_2$  [PAR-1-  
33 PAR-2] at the posterior cortex (Figure 8E), while P1 cells exhibited symmetric distribution of all PAR  
34 species (Figure 8E). The PAR patterning in the PAR-2-predominant embryos relied on unequal  
35 inheritance in  $A_1$  [CDC-42-PAR-6-PKC-3], but not in  $P_1$  [CHIN-1], between AB and P1 cells (Figure S8).

36

37 We also performed steady-state analysis of the PAR species distribution in two-cell stage *cye-1(RNAi)*  
38 embryos that expressed different levels of PAR-2 (Figures 8F and 8G). *cye-1(RNAi)* zygotes partitioned

1 all PAR species equally and divided symmetrically in size, making two identical daughter cells (Figures  
2 S5 and 8F). Because the mechanism triggering symmetry breaking in *cye-1(RNAi)* embryos is unknown,  
3 we analysed a steady-state solution from an initial condition with transient random fluctuation of all four  
4 PAR species at the cortex. When the level of  $P_2$  [PAR-1–PAR-2] was higher (up to 2.5-fold increase  
5 compared to the wild-type condition), both daughter cells segregated  $A_1$  [CDC-42–PAR-6–PKC-3] and  
6  $A_2$  [PAR-3–PAR-6–PKC-3] at the anterior cortex and  $P_1$  [CHIN-1] and  $P_2$  [PAR-1–PAR-2] at the posterior  
7 cortex (Figure 8G). Reduction of the  $P_2$  [PAR-1–PAR-2] level (to less than 50%) caused symmetric  
8 distribution in all PAR species in both daughter cells (Figure 8H), indicating the  $P_2$  [PAR-1–PAR-2] level  
9 as one of the bifurcation parameters that switch PAR patterning between apolar and polar states.  
10 Therefore, our simulation could recapitulate the PAR patterning in two-cell stage embryos subjected to  
11 manipulation of the balance between PAR proteins. These analyses reveal that unequal inheritance of  
12 the balance between antagonizing PAR proteins plays a critical role in the binary specification of PAR  
13 patterning in two-cell stage embryos.

## 1 DISCUSSION

2

3 In this report, we presented evidence indicating that the binary specification between asymmetric and  
4 symmetric modes of cell division relies on the balance between antagonizing PAR proteins in *C. elegans*  
5 embryos. We demonstrated that manipulating the levels of two PAR proteins (PAR-2 and PAR-6) inherited  
6 during the first cell division could induce all combinations of asymmetric and/or symmetric pattern of  
7 PAR proteins in their daughter cells. The polarized PAR domains artificially induced in these daughter  
8 cells were sufficient to establish the unequal inheritance of fate determinants, resulting in successful  
9 induction of asymmetric cell division. These results indicate that changes in the balance between PAR  
10 proteins are sufficient to re-program the otherwise invariable lineage of cell division modes. Moreover,  
11 the division mode adopted occurred independently of the unequal inheritance of fate determinants, cell-  
12 size asymmetry, and cell-cycle asynchrony between the two sister cells. Given that the division modes  
13 in two-cell stage embryos are directed in a cell-autonomous manner (Priess and Thomson, 1987), the  
14 intrinsic cue that specifies the division mode must be unequally inherited during the first cell division. We  
15 propose that the balance between antagonizing PAR proteins, which should be inherited unequally  
16 during the first cell division, is the previously-unknown intrinsic cue used to specify the division modes  
17 in AB and P1 cells. Our simulation also support that the balance between antagonizing PAR proteins can  
18 be a bifurcation parameter that controls the self-organizing interactions among PAR proteins in two-cell  
19 stage embryos. A certain balance of PAR protein levels promotes the self-organization of antagonizing  
20 PAR proteins into a mutually-exclusive pattern at the cortex, which then mediates the asymmetric  
21 segregation of fate determinants. In contrast, a distinct balance that does not permit the self-organizing  
22 interactions results in the maintenance of unpolarized PAR domains, which causes the equal segregation  
23 of fate determinants. During normal development, P1 cells may use such self-organizing mechanism to  
24 re-establish the asymmetric distribution of PAR proteins, whereas AB cells exhibit a disproportion in PAR  
25 proteins that blocks the self-organization.

26

27 PAR proteins have been generally considered as passive effectors of the intrinsic cell-division program.  
28 Especially, the segregation of PAR proteins is induced by the intrinsic cue from centrosomes in *C.*  
29 *elegans* zygotes (Klinkert et al., 2019; Reich et al., 2019; Zhao et al., 2019). In contrast, our findings  
30 highlight that the self-organizing property of antagonizing PAR proteins serves as an active cue that  
31 instructs the intrinsic cell-division program in two-cell stage embryos. Recent studies observed delayed  
32 polarization of PAR proteins in zygotes depleted of a centrosome-mediated cue, Aurora-A (Klinkert et al.,  
33 2019; Reich et al., 2019; Zhao et al., 2019), suggesting the centrosome-independent self-organizing  
34 property of PAR proteins. We propose that unequal inheritance of the self-organizing property of PAR  
35 proteins plays a critical role in the binary specification of PAR patterning in two-cell stage embryos. It will  
36 be necessary to test if manipulating the PAR balance in other cell types can be sufficient to induce self-  
37 organization of PAR proteins and thus promote asymmetric mode of cell division during later stages of  
38 development.

39

1 Conventionally, the PAR network involves a two-node topology comprising a single reciprocal exclusion  
2 pathway among the PAR proteins (Blanchoud et al., 2015; Chau et al., 2012; Dawes and Munro, 2011;  
3 Goehring et al., 2011; Gross et al., 2019; Hoege and Hyman, 2013). A recent study proposed a cross-  
4 inhibitory network between PAR-3–PKC-3–PAR-6–CDC-42 at the anterior cortex and PAR-1–PAR-2 and  
5 CHIN-1 at the posterior cortex (Sailer et al., 2015). However, this model assumes that PAR-3 is required  
6 for the cortical recruitment of PAR-6 in the steady state. Here, we demonstrated that a simple two-node  
7 pathway of PAR proteins (one containing PAR-3–PAR-6–PKC-3 and the other, PAR-1–PAR-2) is  
8 complemented by another pathway of reciprocal cortical exclusion. This secondary pathway involves  
9 the polarized activity of CDC-42 (one node containing CDC-42–PAR-6–PKC-3 and the other, CHIN-1).  
10 Our simulations based on a combinatorial network of two reciprocal exclusion pathways recapitulate the  
11 cortical patterning of PAR proteins in zygotes under various balances of PAR proteins. Our observations  
12 of *C. elegans* zygotes also highlight that this combinatorial network ensures the cortical polarization of  
13 PAR-6 even in the absence of (1) cortical enrichment of PAR-3 and (2) reciprocal exclusion between  
14 PAR-2 and PAR-6. Indeed, the robustness of the combinatorial network enables uncoupling the  
15 inheritance of PAR proteins from that of fate determinants during the first cell division. These findings are  
16 consistent with previous observations wherein several alleles of *par* mutants failed to establish the  
17 reciprocal exclusion of PAR proteins but induced the polarization of P-granules within the cytoplasm  
18 (Bowerman et al., 1997; Boyd et al., 1996; Kempfues et al., 1988; Morton et al., 2002). Our results further  
19 reveal that the reciprocal exclusion of PAR proteins in zygotes is not essential for the unequal inheritance  
20 of fate determinants but is necessary for the maintenance of invariable cell-division lineage in two-cell  
21 stage embryos.

22

23 Previous studies have implicated PAR polarity in cortical polarization and asymmetric cell division in  
24 many cell types, including *Drosophila* neuroblasts (Knoblich, 2010), vertebrate embryos (Maitre et al.,  
25 2016), neural progenitor cells (Homem et al., 2015), and several types of stem cells (Chang et al., 2007;  
26 Dumont et al., 2015; Lechler and Fuchs, 2005). The striking conservation of the function of PAR proteins  
27 in both invertebrates and vertebrates raises a possibility that the self-organizing PAR system is a  
28 conserved executor of the binary decision between the two division modes. Interestingly, the ratios of  
29 PAR proteins can be modified dynamically during development. For example, the ratio of PAR-3 to PAR-  
30 1 is actively modified to induce morphogenetic movement in *Drosophila* epithelium (Wang et al., 2012).  
31 It is therefore tempting to speculate that the balance between antagonizing PAR proteins could be  
32 controlled dynamically to affect the facultative choice between the two modes of cell division during  
33 development. Indeed, many types of stem cells shift between these modes to balance the needs of self-  
34 renewal and cell differentiation (Morrison and Kimble, 2006). Hence, our findings suggest that the  
35 dynamic control of cortical polarization is directly linked to the binary specification regarding the  
36 asymmetric or symmetric mode of cell division, a critical decision faced by every single cell in a  
37 multicellular organism.

38

1     **ACKNOWLEDGMENTS**

2

3     This study was supported by the Singapore National Research Foundation (NRF-NRFF2012-08 [F.M.]),  
4     and the Strategic Japan-Singapore Cooperative Research Program by the Japan Science and  
5     Technology Agency and the Singapore Agency for Science, Technology, and Research (1514324022  
6     [F.M.] and 15658064 [T.S.]). We are grateful to Nathan Goehring (The Francis Crick Institute), Pierre  
7     Gonczy (EPFL), Monica Gotta (University of Geneva), Carsten Hoege and Anthony Hyman (MPI), Ken  
8     Kemphues (Cornel University), Jean-Claude Labbe (IRIC), Shibi Mathew (Temasek Life-sciences  
9     Laboratory), Geraldine Seydoux (Johns Hopkins University), Shigeo Ohno (Yokohama-City University),  
10    Zhen Zhang and Pakorn Kanchanawong (Mechanobiology Institute, Singapore), and the Caenorhabditis  
11    Genetic Center for strains, reagents and expertise. We also thank Andrew Wong (Mechanobiology  
12    Institute, Singapore) and members in the Motegi lab for comments on the manuscript.

13

14

15    **AUTHOR CONTRIBUTIONS**

16

17    The experimental design and presented ideas were developed together by all authors. F.M. guided the  
18    study and wrote the manuscript with input from all authors. Y.W.L. performed all experiments. F.L.W.,  
19    P.S., and T.S. developed the theoretical models for an inter-connecting network of two reciprocal cortical  
20    exclusion pathways.

21

22

23    **DECLARATION OF INTERESTS**

24

25    The authors declare no competing financial interests.

## 1 METHODS

2

### 3 ***C. elegans* strains and RNAi**

4 *C. elegans* transgenes were constructed in the Gateway destination vector (pID3.01 or pID2.02) and  
5 transformed into worms by biolistic transformation. The strains used in this study are listed in Table S1.  
6 Strains were maintained at 20°C and shifted to 25°C for 20–30 hours before recording. RNAi experiments,  
7 except for *par-6(3'UTR RNAi)*, were performed by the feeding method. The RNAi constructs used in this  
8 study are listed in Table S2. L4440-based RNAi clones were transformed into *Escherichia coli* (*E. coli*)  
9 HT115 cells. The transformants were grown at 37°C in liquid LB media supplemented with 500 µg/mL  
10 carbenicillin. A volume of 100 µL of transformed *E. coli* liquid culture was seeded onto Nematode Growth  
11 Media (NGM) plates with 1 mM IPTG, and incubated at room temperature overnight. Worms at the L3/L4  
12 stage were transferred to feeding RNAi plates and incubated at 25°C for 24 hours. *par-6(3'UTR RNAi)*  
13 was performed by the soaking method. *par-6* 3' UTR sequence was prepared by PCR with following  
14 primers and genomic DNA of N2 worms as a template.

15 5'-GTAATACGACTCACTATAGGGC aaaactctttcagccattttcc-3'

16 5'-GCGTAATACGACTCACTATAGGGC tcactaataatgtgaatttcagg-3'

17 Double-stranded RNA (dsRNA) was prepared by *in vitro* transcription of a PCR product with T7 RNA  
18 polymerase. Worms at the L4 stage were incubated in a solution containing dsRNA at concentration 1  
19 mg ml<sup>-1</sup> at 20 °C for 24 hours, and then grown on an NGM plate at 25°C. Their phenotypes were observed  
20 24 hours after removal of from the dsRNA solution.

21

### 22 **Imaging of *C. elegans***

23 For live imaging, embryos were isolated from gravid hermaphrodite animals into egg salt buffer, placed  
24 on coverslips, and inverted on to slides with 20 µm monodisperse polystyrene beads (Bangs  
25 Laboratories, Inc). Embryos were observed at 25°C with a CFI Plan Apochromat 60× N.A.1.4 oil  
26 immersion lens on a Nikon Ni-E motorized upright microscope (Nikon) fitted with a CSU-X1 spinning disk  
27 confocal system (Yokogawa Electric Corp.) with LaserStack 491, 561, and 642 solid-state diode lasers  
28 (Intelligent Imaging Innovation Inc.). Images were acquired with a Photometrics Evolve512 camera  
29 (Photometrics) controlled by Metamorph software (Intelligent Imaging Innovation Inc.) using a 250 ms  
30 exposure at 20% power on the 491 and 561 lasers and 1×1 binning in the camera. Nuclear envelope  
31 breakdown (NEBD) was defined as the first frame when the GFP fusion was no longer excluded from  
32 pronuclei.

33 For immunofluorescence staining, embryos were isolated into egg buffer and fixed on poly-lysine-  
34 coated slides using methanol at -20°C for 20 min, followed by acetone at -20°C for 10 min. The primary  
35 antibodies used were rabbit anti-PAR-2 (Hoegge et al., 2010), rabbit anti-PAR-1 (Gonczy et al., 2001),  
36 rabbit anti-PKC-3 (Tabuse et al., 1998), mouse anti-PAR-3 (P4A1, DSHB), mouse anti-PGL-1 (K76,  
37 DSHB), and mouse anti-MEX-5 (Griffin et al., 2011; Schubert et al., 2000). Secondary antibodies used  
38 were goat anti-rabbit coupled to Alexa488, goat anti-rabbit coupled to Cy3, or goat anti-mouse coupled

1 to Cy3 or Cy5, all at a 1:8,000 dilution. Samples were mounted with Vectashield Antifade Medium with  
2 DAPI (Vector Laboratories) to stain DNA. All antibodies used in this study are listed in Table S3.

3

#### 4 **Quantification of cortical PAR proteins and cytoplasmic fate determinants**

5 To quantify the distribution of PAR proteins at the cell cortex in live zygotes (Figure S2), we used ImaEdge  
6 software (Zhang et al., 2017), which was designed for automatic extraction of the cortex region from  
7 each frame of time-lapse movies. The cortical region along the entire circumference was divided into  
8 100 sampling windows. The maximum intensity in each sampling window was used to represent the  
9 amount of proteins-of-interest at the cortex. We then generated a 2D heat map with the frame number as  
10 the horizontal axis and the position of the sampling windows as the vertical axis to integrate the  
11 spatiotemporal information of cortical PAR proteins.

12 The total levels of GFP::PAR-2 in zygotes were estimated by the average fluorescence intensities  
13 of GFP::PAR-2 in the cytoplasm of zygotes shortly after fertilization (before polarization of GFP::PAR-2 at  
14 the cortex). A box of 75.1  $\mu\text{m}^2$  at the center position in the GFP::PAR-2 images (taken at about 2  $\mu\text{m}$   
15 below the upper lateral cortex) was used to measure the average intensity. The GFP::PAR-2 intensity of  
16 each zygote was normalized to the mean value of GFP::PAR-2 intensity in embryos expressing  
17 unmodified *gfp::par-2* transgene (JH2952).

18 The sizes of cortical GFP::PAR-2 and mCherry::PAR-6 domains were determined by the extent of  
19 each fluorescence protein occupying the circumference of the zygote. The surface of the zygote was  
20 manually traced using ImageJ software. The edge of each cortical domain was defined at the region  
21 where either GFP::PAR-2 or mCherry::PAR-6 intensity is about 40% of the maximum intensity within the  
22 corresponding cortical domain. The length of the cortical PAR-2 domain and that of the cortical PAR-6  
23 domain were independently measured and represented as a percentage of the total circumference of  
24 the zygote.

25 The distribution of cortical PAR proteins (PAR-1, GFP::PAR-2, PAR-3, and mCherry::PAR-6) in  
26 zygotes were assessed by the integrated intensity of cortical PAR proteins within the anterior and the  
27 posterior cortical domains. The surface of the zygote was manually traced and divided into two halves  
28 with Metamorph software using the line-scan function. The segregation of the posterior proteins (PAR-1  
29 and GFP::PAR-2) was represented as a ratio of their average intensity within the posterior domain to that  
30 within the anterior domain. The segregation of the anterior proteins (PAR-3 and mCherry::PAR-6) was  
31 represented as a ratio of their average intensity within the anterior domain to that within the posterior  
32 domain.

33 The distribution of cytoplasmic fate determinants, MEX-5 and PIE-1, were assessed by their  
34 average intensity within the anteromedial and the posteromedial cytoplasm, respectively. A box of 75.1  
35  $\mu\text{m}^2$  or 27.0  $\mu\text{m}^2$  was used to measure the intensities of MEX-5 and PIE-1, respectively, with Metamorph  
36 software. The segregation of MEX-5 was represented as a ratio of the average intensity within the  
37 anteromedial cytoplasm over that within the posteromedial cytoplasm. The segregation of PIE-1 was



1 represented as a ratio of the average intensity within the posteromedial cytoplasm over that within the  
2 anteromedial cytoplasm.

3

#### 4 **Statistical tests and reproducibility**

5 All statistical tests were performed using GraphPad Prism 7.0. All results presented in graphs represent  
6 the mean  $\pm$  s.d. The D'Agostino-Pearson omnibus test was used for normality testing. A student's t test  
7 (two-tailed distribution) and non-parametric Mann-Whitney U-test were used to calculate  $p$ -values. The  
8 exact sample number value is indicated in the corresponding figure or figure legend. All experiments  
9 with or without quantification were independently repeated at least three times with similar results, and  
10 the representative data are shown. No statistical method was used to predetermine the sample size. The  
11 experiments were not randomized. The investigators were not blinded to allocation during experiments  
12 or outcome assessment.

13

#### 14 **Mathematical modeling of PAR polarity in *C. elegans* zygotes**

15

16 1) Previous models of PAR polarity in *C. elegans* zygotes

17 Previous models (Blanchoud et al., 2015; Dawes and Munro, 2011; Goehring et al., 2011) considered  
18 two species of PAR proteins. The anterior group of proteins (A) comprises of PAR-3, PAR-6, and PKC-3.  
19 The posterior group of proteins (P) is consisted of PAR-1, PAR-2, and LGL-1 (Figure S4A). The local  
20 cortical concentrations of A and P at time  $t$  and cortical position  $x$ , were designated by  $A$  and  $P$ ,  
21 respectively, and were calculated from the following equations:

$$\begin{aligned} \frac{\partial A}{\partial t} &= D_A \frac{\partial^2 A}{\partial x^2} - \frac{\partial(vA)}{\partial x} + [K_{\text{on},A} A^{\text{cyto}} - K_{\text{off},A} A - K_{AP} P^\delta A] \\ \frac{\partial P}{\partial t} &= D_P \frac{\partial^2 P}{\partial x^2} - \frac{\partial(vP)}{\partial x} + [K_{\text{on},P} P^{\text{cyto}} - K_{\text{off},P} P - K_{PA} A^\zeta P] \end{aligned}$$

23

24  $D_A$  and  $D_P$  represent the diffusivity of each PAR species in the membrane-bound state.  $v(x,t)$  refers to the  
25 cortical flow velocity.  $k_{\text{on},A}$ ,  $k_{\text{off},A}$ ,  $k_{\text{on},P}$  and  $k_{\text{off},P}$  are values for the respective coefficients for cortical  
26 association and dissociation of each PAR species.  $A^{\text{cyto}}$  and  $P^{\text{cyto}}$  are uniform cytoplasmic concentrations  
27 of A and P proteins, respectively. The second terms on the right side describe the initial segregation of  
28 both PAR species, which is mediated by advective cortical flow from the posterior pole to the anterior  
29 pole.

30 The above-described models (Blanchoud et al., 2015; Dawes and Munro, 2011; Goehring et al.,  
31 2011) reproduced the establishment and the maintenance of the steady-state PAR species distribution  
32 in wild-type zygotes. The model by (Goehring et al., 2011) also reproduced the PAR patterns in *spd-*  
33 *5(RNAi)* zygotes where advective cortical flows were attenuated. It also recapitulated the shift of a  
34 boundary position between two cortical domains in zygotes where either A or P was overexpressed or  
35 knocked-down (Goehring et al., 2011). However, these models were unable to reproduce the PAR

1 distributions in zygotes wherein PAR-2 was predominant (by a combination of GFP::PAR-2  
2 overexpression and *par-6(pRNAi)* treatment) (Figure S4C).

3

4 2) A revised model of PAR polarity in *C. elegans* zygotes

5 To explain our observations and include findings from recent literatures, we revised the previous models  
6 by incorporating two additional PAR species, [CDC-42–PAR-6–PKC-3] and [CHIN-1], and including  
7 several molecular interactions among the PAR species (Figures 4A and S4B). PAR-3 recruits PAR-6 and  
8 PKC-3 to cortical cluster structures during polarization (Wang et al., 2017). CDC-42 can recruit PAR-6  
9 and PKC-3 to the cortex independently of PAR-3 clusters (Rodriguez et al., 2017; Wang et al., 2017).  
10 Hence, the anterior cortical domain contains at least two species, [PAR-3–PAR-6–PKC-3] and [CDC-42–  
11 PAR-6–PKC-3]. CHIN-1 has been shown to localize at the posterior cortex and restricts activation of  
12 CDC-42 at the anterior cortical domain (Kumfer et al., 2010)(Sailer et al., 2015). PAR-2 is essential to  
13 recruit PAR-1 (Boyd et al., 1996) but dispensable to localize CHIN-1 at the posterior cortex (Sailer et al.,  
14 2015). CHIN-1 and PAR-1–PAR-2 act in parallel to maintain the polarized PAR domains (Sailer et al.,  
15 2015). Thus, the posterior cortical domain includes at least two species, [CHIN-1] and [PAR-1–PAR-2].  
16 We did not include another posterior protein, LGL-1, because it is dispensable to pattern the cortical  
17 PAR domains (Beatty et al., 2010; Hoege et al., 2010). Hence, our revised model for the establishment  
18 of PAR polarity relies on four species of PAR proteins. [CDC-42–PAR-6–PKC-3] and [PAR-3–PAR-6–  
19 PKC-3] are referred as  $A_1$  and  $A_2$ , respectively, as they localize at the anterior cortical domain. [CHIN-1]  
20 and [PAR-1–PAR-2] are referred as  $P_1$  and  $P_2$ , respectively, as they localize at the posterior cortical  
21 domain.

22

23  $A_1$ : CDC-42–PAR-6–PKC-3

24  $A_2$ : PAR-3–PAR-6–PKC-3

25  $P_1$ : CHIN-1

26  $P_2$ : PAR-1–PAR-2

27

28 Given that CDC-42 is essential for PKC-3 to exclude PAR-2 independently of PAR-3 (Rodriguez et al.,  
29 2017), we included an inhibitory interaction from  $A_1$  [CDC-42–PAR-6–PKC-3] to  $P_2$  [PAR-1–PAR-2] in our  
30 model. Two previous reports (Rodriguez et al., 2017; Wang et al., 2017) also proposed that PAR-6 and  
31 PKC-3 could associate with either PAR-3 or CDC-42 on the cortex. Because PAR-3 is generally essential  
32 to recruit PAR-6 and PKC-3 during polarization (Wang et al., 2017), we include a positive interaction from  
33  $A_2$  [PAR-3–PAR-6–PKC-3] to  $A_1$  [CDC-42–PAR-6–PKC-3]. CHIN-1 is excluded from the anterior cortex  
34 through an unknown mechanism that relies on PKC-3 (Sailer et al., 2015), and interferes active CDC-42  
35 within the posterior cortical domain (Kumfer et al., 2010; Sailer et al., 2015). We thus include reciprocal

1 inhibitory interactions: one from  $A_1$  [CDC-42-PAR-6-PKC-3] to  $P_1$  [CHIN-1], the other from  $P_1$  [CHIN-1]  
 2 to  $A_1$  [CDC-42-PAR-6-PKC-3].

3 Diffusion rates of all four species in the cytoplasm are assumed to be much faster than their  
 4 respective rates on the cell cortex (Goehring et al., 2011). Therefore, cytoplasmic concentration of these  
 5 species should be uniform and quasi-statically adapted to their molecular interactions on the cortex. We  
 6 denoted the cortical concentration of four species as  $A_1, A_2, P_1, P_2$ . The time evolution of the local  
 7 concentration on the membrane at time  $t$  and position  $x$  is described by the following equations:

8

$$\begin{aligned}
 \frac{\partial A_1}{\partial t} &= D_{A_1} \frac{\partial^2 A_1}{\partial x^2} + \left[ K_{\text{on},A_1} \left( 1 + K_{A_1 A_2} A_2^\gamma \right) A_1^{\text{cyto}} - K_{\text{off},A_1} A_1 - K_{A_1 P_1} P_1^\alpha A_1 \right] \\
 \frac{\partial P_1}{\partial t} &= D_{P_1} \frac{\partial^2 P_1}{\partial x^2} + \left[ K_{\text{on},P_1} P_1^{\text{cyto}} - K_{\text{off},P_1} P_1 - K_{P_1 A_1} A_1^\beta P_1 \right] \\
 \frac{\partial A_2}{\partial t} &= D_{A_2} \frac{\partial^2 A_2}{\partial x^2} + \left[ K_{\text{on},A_2} A_2^{\text{cyto}} - K_{\text{off},A_2} A_2 - K_{A_2 P_2} P_2^\delta A_2 \right] \\
 \frac{\partial P_2}{\partial t} &= D_{P_2} \frac{\partial^2 P_2}{\partial x^2} + \left[ K_{\text{on},P_2} P_2^{\text{cyto}} - K_{\text{off},P_2} P_2 - K_{P_2 A_1} A_1^\zeta P_2 \right]
 \end{aligned} \tag{1}$$

10

11 On the right side, the first terms are diffusion terms describing diffusional transport on the cortex with  
 12 diffusion constants,  $D_{A_1}$ ,  $D_{P_1}$ ,  $D_{A_2}$ , and  $D_{P_2}$ . The next three terms are reaction terms explaining molecular  
 13 interactions among the PAR species. The second set of terms describe cortical binding with binding  
 14 rates  $K_{\text{on},A_1}$ ,  $K_{\text{on},P_1}$ ,  $K_{\text{on},A_2}$ , and  $K_{\text{on},P_2}$  per unit cytosolic concentrations. For example, in the first equation,  
 15 the binding of  $A_1$  is promoted by the presence of  $A_2$  with the coefficient  $K_{A_1 A_2}$ . The third set of terms  
 16 explain dissociation rates from the cortex with the unbinding rates  $K_{\text{off},A_1}$ ,  $K_{\text{off},P_1}$ ,  $K_{\text{off},A_2}$ , and  $K_{\text{off},P_2}$ . The  
 17 fourth set of terms also refer to dissociation stimulated by the mutual antagonism between the molecules  
 18  $P_1$  and  $A_1$  with the rates  $K_{A_1 P_1}$  and  $K_{P_1 A_1}$ , the inhibition from  $P_2$  to  $A_2$  with the rate  $K_{A_2 P_2}$ , and the inhibition  
 19 from  $A_1$  to  $P_2$  with the rate  $K_{P_2 A_1}$ . Cytosolic concentrations of each PAR species were calculated from  
 20 total concentration minus cortical concentration. For example, cytosolic concentrations of  $A_1$  can be  
 21 described as following:

22

$$A_1^{\text{cyto}} = A_1^{\text{total}} - \psi \overline{A_1}; \quad \overline{A_1} = \frac{1}{L} \int_{-\frac{L}{2}}^{\frac{L}{2}} A_1 dx,$$

23

24  $\psi$  is the surface-to-volume conversion factor.  $L$  is the perimeter along the anteroposterior axis of zygote  
 25 (Goehring et al., 2011). Since the periphery of the zygote was assumed to be a one-dimensional space,  
 26 equations (1) was considered under the periodic boundary condition. We used Matlab to manually obtain  
 27 numerical values of steady-state solutions in equations (1). For the initial condition, we considered a  
 28 spatially uniform steady-state solution for the four variables and put higher values for  $P_1$  and  $P_2$  in the  
 29 posterior region. Depending on the parameter sets, various PAR species ( $A_1, P_1, A_2, P_2$ ) can distribute

1 either uniformly or asymmetrically in a specific region of the cortex. The parameter values in wild-type  
2 (WT) zygotes are summarized in Table S4.

3 Like the previous models (Blanchoud et al., 2015; Dawes and Munro, 2011; Goehring et al., 2011),  
4 our model also requires multi-stability in the reaction terms that allows each PAR species to account for  
5 both the unpolarized and the polarized state at the cortex. Given that our modelling did not consider the  
6 advection term and relied on both the diffusion term and the reaction term, our simulation only constructs  
7 the steady-state distribution of each PAR species in zygotes.

8 The steady-state concentration profiles in WT condition are shown in Figure 4B.  $A_1$  [CDC-42–  
9 PAR-6–PKC-3] and  $A_2$  [PAR-3–PAR-6–PKC3] are enriched in the anterior domain, whereas the posterior  
10 domain shows high concentrations of  $P_1$  [CHIN-1] and  $P_2$  [PAR-1–PAR-2]. Hereafter, we normalized  
11 concentrations ( $A_1, A_2$ ) and ( $P_1, P_2$ ) with  $A_{\max}$  and  $P_{\max}$ , respectively.  $A_{\max}$  and  $P_{\max}$  are the maximum  
12 values of cortical concentration in  $A_1$  and  $A_2$ , and in  $P_1$  and  $P_2$ , respectively. We then plotted normalized  
13 concentrations of the respective proteins against the length of the embryo, from the anterior to the  
14 posterior poles. The cortical domain size of each PAR species is defined as the percentage of the cortical  
15 region where protein concentration is equal to or greater than 40% of its maximum concentration at the  
16 cortex. The domain size of  $A_1$  species, for example, can be calculated by using the following formula:

17 
$$\text{domain size} = \frac{\int \delta[A_1(x) - 0.4 \times A_{1\max}] dx}{\oint dx}$$

18  
19 where the cortical concentration of  $A_1$  at the cortical position  $x$  is defined as  $A_1(x)$ ,  $\delta[x]$  is the Heaviside  
20 step function, and  $\oint dx = L$ .

### 21 3) Overexpression, knockdown, and knockout experiments *in silico*

22 To simulate experimental conditions where one (or more) PAR species was either knocked-down (KD),  
23 knocked-out (KO), or overexpressed (OE), we changed total concentrations of each PAR species in our  
24 simulations as they would have experimentally. The results for *in silico* KD, KO, OE manipulations are  
25 explained in detail below, and are shown in Figures 4C-4I and S4D-S4G.

26

#### 27 1. PAR-6 KO or PAR-2 KO

28 When the total concentration of  $A_1$  ( $A_1^{\text{total}}$ ) or  $P_2$  ( $P_2^{\text{total}}$ ) is at zero, cortical polarity exhibits nearly uniform  
29 distribution of  $P_2$  or  $A_1$ , respectively (Figures 4C and 4D). These results are consistent with previous  
30 observations (Boyd et al., 1996; Cuenca et al., 2003; Hung and Kemphues, 1999) and our results in  
31 Figure 2B.

32

#### 33 2. PAR-2 KD or PAR-2 OE

34 When  $P_2^{\text{total}}$  is reduced from the WT value of 1 to 0.1, the size of cortical  $P_2$  domain decreased, and that  
35 of cortical  $A_1$  domain increased, shifting the boundary between the  $A_1$  and the  $P_2$  domains from anterior

1 to posterior (Figures 4F and S4D). When the total concentration of  $P_2$  ( $P_2^{\text{total}}$ ) is increased from the WT  
2 value of 1 to 5, the size of cortical  $P_2$  domain increased, and that of cortical  $A_1$  domain reduced, shifting  
3 the boundary between the  $A_1$  and the  $P_2$  domains from posterior to anterior (Figures S4D and S4E). These  
4 results are consistent with the previous observation (Goehring et al., 2011) and our results in Figure 2A.

5

6 3. PAR-2 OE either at WT background or at PAR-6 KD background

7 To systematically explore the effect of different levels of PAR-2 OE *in silico*, the total concentration of  $P_2$   
8 ( $P_2^{\text{total}}$ ) is increased from the WT value of 1 to 10. The corresponding size of  $A_1$  and  $P_2$  domains are  
9 shown in Figures S4D and S4E. The changes in cortical domain sizes in response to PAR-2 OE exhibit  
10 two distinct phases: When  $P_2^{\text{total}}$  increases from 1, the size of  $A_1$  domain gradually decreases due to the  
11 expansion of  $P_2$  domain. At around  $P_2^{\text{total}} = 5$ , the solution of equations (1) shows a bifurcation, leading to  
12 a qualitative change in the distribution of concentrations. At this bifurcation point, distribution of  $P_2$   
13 changes from the polarized state to the unpolarized state showing high concentration of  $P_2$  throughout  
14 the cortex. Despite the  $P_2$  distribution throughout the cortex, the distribution of  $A_1$  remains at the  
15 polarized state (Figures S4D and S4E).

16 We next tested if PAR-6 KD could compromise the stability of the polarized state of PAR-2 in  
17 response to PAR-2 OE treatment. When  $A_1^{\text{total}}$  is lower than the WT value, the increase in  $P_2^{\text{total}}$  causes a  
18 similar bifurcation for  $P_2$  (the distribution changes from the polarized state to the unpolarized state) at a  
19 lower value of  $P_2^{\text{total}}$  compared to the WT case (Figures 4H and S4F). Such a shift of the bifurcation point  
20 in  $P_2^{\text{total}}$  can be explained by the antagonistic interaction from  $A_1$  to  $P_2$ . Because  $A_1$  antagonizes  $P_2$ , a  
21 lower level of  $A_1^{\text{total}}$  permits  $P_2$  to dominate the entire cortex even at lower  $P_2^{\text{total}}$ . This result is consistent  
22 with our observation of *par-6(pRNAi)* zygotes overexpressing GFP::PAR-2 in Figure 2A.

23

24 4. CHIN-1 KD with or without PAR-2 OE

25 At the WT background, a reduction in  $P_1^{\text{total}}$  does not cause significant changes in the distribution  
26 patterns in  $A_1$ ,  $A_2$ , and  $P_2$  (Figure 4E). In contrast, under  $P_2$  OE condition, reduction in  $P_1^{\text{total}}$  depolarizes  
27  $A_1$  domain at the  $P_2$  bifurcation point where  $P_2$  becomes uniform at the cortex (Figures 4I and S4G). This  
28 result suggested a role of CHIN-1 in maintaining cortical PAR-6 domain in zygotes with a PAR-2  
29 predominance. This is consistent with our observation of *chin-1(RNAi);par-6(pRNAi)* zygotes  
30 overexpressing GFP::PAR-2 in Figure 3F.

31

### 32 **Mathematical modeling of PAR polarity in two-cell stage embryos**

33

34 To simulate the distribution of PAR proteins in two-cell stage embryos, we applied the inter-connected  
35 network involving the four PAR species ( $A_1$ ,  $A_2$ ,  $P_1$ , and  $P_2$ ) in Eq. (1), which was used for the PAR pattern  
36 simulation in zygotes, to AB and P1 cells. We considered simulation data of the steady-state distribution

1 of the PAR species in zygote for the initial condition of two-cell stage embryos. The PAR species were  
2 compartmentalized between AB and P1 cells at the position of a cleavage furrow, which was  
3 experimentally measured in zygotes. Therefore, the initial profile of the PAR species in AB and P1 cells  
4 were copied respectively from the anterior and posterior portion of the zygote with length  $L_{AB}$  and  
5  $L_{P1}$  ( $L_{AB} + L_{P1} = L$ , the total length of the zygote). Based on *in vivo* observations, we set  $L_{AB} = 0.55 \times L$   
6 and  $L_{P1} = 0.45 \times L$  for both wild-type and PAR-2-predominant embryos and  $L_{AB} = L_{P1} = 0.50 \times L$  for *cye-*  
7 *1(RNAi)* embryos. The parameter values in wild-type (WT), P2OE, and *cye-1(RNAi)* embryos are  
8 summarized in Table S4, S5 and S6, respectively.

9

#### 10 (1) Wild-type embryos

11 Through unequal inheritance of all four PAR species during the first cell division, AB and P1 cells inherited  
12 different total concentration of the PAR species. The AB cell increased the total concentration of  $A_1$  and  
13  $A_2$  and decreased the total concentration of  $P_1$  and  $P_2$ . The total concentration of the PAR species in the  
14 P1 cell were determined according to the law of mass conservation. Therefore, the P1 cell decreased  
15 the total concentration of  $A_1$  and  $A_2$  and increased the total concentration of  $P_1$  and  $P_2$ . For the zygote  
16 and its daughter cells, the law of mass conservation was given as

17

$$18 \quad C_0 \times V_0 = C_1 \times V_1 + C_2 \times V_2$$

24

19 where  $C_0$ ,  $C_1$  and  $C_2$  are the total PAR concentration ( $A_1^{total}$ ,  $A_2^{total}$ ,  $P_1^{total}$ , or  $P_2^{total}$ ) in zygote, AB cell,  
20 and P1 cell, respectively.  $V_0$ ,  $V_1$ , and  $V_2$  are their respective volumes. For the wild-type conditions,  
21  $V_1/V_0 = 0.55$  and  $V_2/V_0 = 0.45$ . With the given changes in the total concentration of  $A_1$ ,  $A_2$ ,  $P_1$  and  $P_2$ , the  
22 distribution of the PAR species in AB and P1 cells were numerically calculated until their spatial pattern  
23 reached the steady state. The parameter values used for WT embryo are given in Table S4.

25

26 Simulations in other conditions, such as PAR-2 overexpression (P2OE) and *cye-1(RNAi)* with higher or  
27 lower levels of PAR-2, were performed in a similar approach. The particular changes from simulations in  
28 the wild-type condition are summarized below.

29

#### 30 (2) P2OE embryos

31 A higher total concentration of  $P_2$  was used for simulation of the steady state in zygotes. Because of  
32 nearly symmetric distribution of  $A_2$  and  $P_2$  in the P2OE zygotes, the total concentration of  $A_2$  and  $P_2$  in AB  
33 and P1 cells were similar to those in the zygote. The total concentration of  $A_1$  was increased and that of  
34  $P_1$  was decreased for the AB cell, while the total concentration of  $A_1$  was decreased and that of  $P_1$  was  
35 increased for the P1 cell, satisfying the conservation law. The parameter values are summarized in Table  
36 S5.

37

1 (3) *cye-1(RNAi)* embryos

2 Because of equal inheritance of all PAR proteins between the *cye-1(RNAi)* daughter cells, the total  
3 concentrations of  $A_1$ ,  $A_2$ ,  $P_1$ , and  $P_2$  in these cells were the same as those in the zygote. For the initial  
4 condition of the daughter cells, we considered a spatially uniform steady state solution for the four  
5 variables (  $A_1$ ,  $A_2$ ,  $P_1$ , and  $P_2$  ) with random fluctuations. The total concentration of  $P_2$  was modified to  
6 simulate the cells with higher or lower  $P_2$  condition. The parameter values are summarized in Table S6.

7

#### 8 **Data availability**

9 All data and materials supporting the findings of this study are available from the corresponding author  
10 on reasonable request.

1 REFERENCES

- 2
- 3 Aceto, D., M. Beers, and K.J. Kemphues. 2006. Interaction of PAR-6 with CDC-42 is required for  
4 maintenance but not establishment of PAR asymmetry in *C. elegans*. *Developmental biology*.  
5 299:386-397.
- 6 Arata, Y., M. Hiroshima, C.G. Pack, R. Ramanujam, F. Moteji, K. Nakazato, Y. Shindo, P.W. Wiseman, H.  
7 Sawa, T.J. Kobayashi, H.B. Brandao, T. Shibata, and Y. Sako. 2016. Cortical Polarity of the RING  
8 Protein PAR-2 Is Maintained by Exchange Rate Kinetics at the Cortical-Cytoplasmic Boundary.  
9 *Cell reports*. 16:2156-2168.
- 10 Beatty, A., D. Morton, and K. Kemphues. 2010. The *C. elegans* homolog of *Drosophila* Lethal giant larvae  
11 functions redundantly with PAR-2 to maintain polarity in the early embryo. *Development*.  
12 137:3995-4004.
- 13 Beers, M., and K. Kemphues. 2006. Depletion of the co-chaperone CDC-37 reveals two modes of PAR-  
14 6 cortical association in *C. elegans* embryos. *Development*. 133:3745-3754.
- 15 Blanchoud, S., C. Busso, F. Naef, and P. Gonczy. 2015. Quantitative analysis and modeling probe  
16 polarity establishment in *C. elegans* embryos. *Biophysical journal*. 108:799-809.
- 17 Bowerman, B., M.K. Ingram, and C.P. Hunter. 1997. The maternal par genes and the segregation of cell  
18 fate specification activities in early *Caenorhabditis elegans* embryos. *Development*. 124:3815-  
19 3826.
- 20 Boyd, L., S. Guo, D. Levitan, D.T. Stinchcomb, and K.J. Kemphues. 1996. PAR-2 is asymmetrically  
21 distributed and promotes association of P granules and PAR-1 with the cortex in *C. elegans*  
22 embryos. *Development*. 122:3075-3084.
- 23 Brenner, S. 1974. The genetics of *Caenorhabditis elegans*. *Genetics*. 77:71-94.
- 24 Chang, J.T., V.R. Palanivel, I. Kinjyo, F. Schambach, A.M. Intlekofer, A. Banerjee, S.A. Longworth, K.E.  
25 Vinup, P. Mrass, J. Oliaro, N. Killeen, J.S. Orange, S.M. Russell, W. Weninger, and S.L. Reiner.  
26 2007. Asymmetric T lymphocyte division in the initiation of adaptive immune responses. *Science*.  
27 315:1687-1691.
- 28 Chau, A.H., J.M. Walter, J. Gerardin, C. Tang, and W.A. Lim. 2012. Designing synthetic regulatory  
29 networks capable of self-organizing cell polarization. *Cell*. 151:320-332.
- 30 Chen, C., J.M. Fingerhut, and Y.M. Yamashita. 2016. The ins(ide) and outs(ide) of asymmetric stem cell  
31 division. *Current opinion in cell biology*. 43:1-6.
- 32 Cheng, N.N., C.M. Kirby, and K.J. Kemphues. 1995. Control of cleavage spindle orientation in  
33 *Caenorhabditis elegans*: the role of the genes par-2 and par-3. *Genetics*. 139:549-559.
- 34 Cowan, C.R., and A.A. Hyman. 2006. Cyclin E-Cdk2 temporally regulates centrosome assembly and  
35 establishment of polarity in *Caenorhabditis elegans* embryos. *Nature cell biology*. 8:1441-1447.
- 36 Cuenca, A.A., A. Schetter, D. Aceto, K. Kemphues, and G. Seydoux. 2003. Polarization of the *C. elegans*  
37 zygote proceeds via distinct establishment and maintenance phases. *Development*. 130:1255-  
38 1265.
- 39 Dawes, A.T., and E.M. Munro. 2011. PAR-3 oligomerization may provide an actin-independent  
40 mechanism to maintain distinct par protein domains in the early *Caenorhabditis elegans* embryo.  
41 *Biophysical journal*. 101:1412-1422.
- 42 Dumont, N.A., C.F. Bentzinger, M.C. Sincennes, and M.A. Rudnicki. 2015. Satellite Cells and Skeletal  
43 Muscle Regeneration. *Compr Physiol*. 5:1027-1059.
- 44 Etemad-Moghadam, B., S. Guo, and K.J. Kemphues. 1995. Asymmetrically distributed PAR-3 protein  
45 contributes to cell polarity and spindle alignment in early *C. elegans* embryos. *Cell*. 83:743-752.
- 46 Goehring, N.W., P.K. Trong, J.S. Bois, D. Chowdhury, E.M. Nicola, A.A. Hyman, and S.W. Grill. 2011.  
47 Polarization of PAR proteins by advective triggering of a pattern-forming system. *Science*.  
48 334:1137-1141.
- 49 Goldstein, B., and I.G. Macara. 2007. The PAR proteins: fundamental players in animal cell polarization.  
50 *Developmental cell*. 13:609-622.



- 1 Gonczy, P., J.M. Bellanger, M. Kirkham, A. Pozniakowski, K. Baumer, J.B. Phillips, and A.A. Hyman. 2001.  
2 zyg-8, a gene required for spindle positioning in *C. elegans*, encodes a doublecortin-related  
3 kinase that promotes microtubule assembly. *Developmental cell*. 1:363-375.
- 4 Gotta, M., and J. Ahringer. 2001. Distinct roles for Galpha and Gbetagamma in regulating spindle  
5 position and orientation in *Caenorhabditis elegans* embryos. *Nature cell biology*. 3:297-300.
- 6 Gotta, M., Y. Dong, Y.K. Peterson, S.M. Lanier, and J. Ahringer. 2003. Asymmetrically distributed *C.*  
7 *elegans* homologs of AGS3/PINS control spindle position in the early embryo. *Current biology* :  
8 *CB*. 13:1029-1037.
- 9 Griffin, E.E. 2015. Cytoplasmic localization and asymmetric division in the early embryo of  
10 *Caenorhabditis elegans*. *Wiley interdisciplinary reviews. Developmental biology*. 4:267-282.
- 11 Griffin, E.E., D.J. Odde, and G. Seydoux. 2011. Regulation of the MEX-5 gradient by a spatially  
12 segregated kinase/phosphatase cycle. *Cell*. 146:955-968.
- 13 Gross, P., K.V. Kumar, N.W. Goehring, J.S. Bois, C. Hoege, F. Jülicher, and S.W. Grill. 2019. Guiding  
14 self-organized pattern formation in cell polarity establishment. *Nature Physics*. 15:293-300.
- 15 Guo, S., and K.J. Kemphues. 1995. par-1, a gene required for establishing polarity in *C. elegans* embryos,  
16 encodes a putative Ser/Thr kinase that is asymmetrically distributed. *Cell*. 81:611-620.
- 17 Hoege, C., A.T. Constantinescu, A. Schwager, N.W. Goehring, P. Kumar, and A.A. Hyman. 2010. LGL  
18 can partition the cortex of one-cell *Caenorhabditis elegans* embryos into two domains. *Current*  
19 *biology* : *CB*. 20:1296-1303.
- 20 Hoege, C., and A.A. Hyman. 2013. Principles of PAR polarity in *Caenorhabditis elegans* embryos. *Nature*  
21 *reviews. Molecular cell biology*. 14:315-322.
- 22 Homem, C.C., M. Repic, and J.A. Knoblich. 2015. Proliferation control in neural stem and progenitor cells.  
23 *Nature reviews. Neuroscience*. 16:647-659.
- 24 Horvitz, H.R., and I. Herskowitz. 1992. Mechanisms of asymmetric cell division: two Bs or not two Bs,  
25 that is the question. *Cell*. 68:237-255.
- 26 Hung, T.J., and K.J. Kemphues. 1999. PAR-6 is a conserved PDZ domain-containing protein that  
27 colocalizes with PAR-3 in *Caenorhabditis elegans* embryos. *Development*. 126:127-135.
- 28 Joberty, G., C. Petersen, L. Gao, and I.G. Macara. 2000. The cell-polarity protein Par6 links Par3 and  
29 atypical protein kinase C to Cdc42. *Nature cell biology*. 2:531-539.
- 30 Kemphues, K. 2000. PARsing embryonic polarity. *Cell*. 101:345-348.
- 31 Kemphues, K.J., J.R. Priess, D.G. Morton, and N.S. Cheng. 1988. Identification of genes required for  
32 cytoplasmic localization in early *C. elegans* embryos. *Cell*. 52:311-320.
- 33 Klinkert, K., N. Levernier, P. Gross, C. Gentili, L. von Tobel, M. Pierron, C. Busso, S. Herrman, S.W. Grill,  
34 K. Kruse, and P. Gonczy. 2019. Aurora A depletion reveals centrosome-independent  
35 polarization mechanism in *Caenorhabditis elegans*. *eLife*. 8.
- 36 Knoblich, J.A. 2008. Mechanisms of asymmetric stem cell division. *Cell*. 132:583-597.
- 37 Knoblich, J.A. 2010. Asymmetric cell division: recent developments and their implications for tumour  
38 biology. *Nature reviews. Molecular cell biology*. 11:849-860.
- 39 Kotak, S. 2019. Mechanisms of Spindle Positioning: Lessons from Worms and Mammalian Cells.  
40 *Biomolecules*. 9.
- 41 Kumfer, K.T., S.J. Cook, J.M. Squirrell, K.W. Eliceiri, N. Peel, K.F. O'Connell, and J.G. White. 2010. CGEF-  
42 1 and CHIN-1 regulate CDC-42 activity during asymmetric division in the *Caenorhabditis*  
43 *elegans* embryo. *Molecular biology of the cell*. 21:266-277.
- 44 Labbe, J.C., A. Pacquelet, T. Marty, and M. Gotta. 2006. A genomewide screen for suppressors of par-  
45 2 uncovers potential regulators of PAR protein-dependent cell polarity in *Caenorhabditis*  
46 *elegans*. *Genetics*. 174:285-295.
- 47 Lechler, T., and E. Fuchs. 2005. Asymmetric cell divisions promote stratification and differentiation of  
48 mammalian skin. *Nature*. 437:275-280.
- 49 Maitre, J.L., H. Turlier, R. Illukkumbura, B. Eismann, R. Niwayama, F. Nedelec, and T. Hiragi. 2016.  
50 Asymmetric division of contractile domains couples cell positioning and fate specification.  
51 *Nature*. 536:344-348.

- 1 Morrison, S.J., and J. Kimble. 2006. Asymmetric and symmetric stem-cell divisions in development and  
2 cancer. *Nature*. 441:1068-1074.
- 3 Morton, D.G., D.C. Shakes, S. Nugent, D. Dichoso, W. Wang, A. Golden, and K.J. Kemphues. 2002. The  
4 *Caenorhabditis elegans* par-5 gene encodes a 14-3-3 protein required for cellular asymmetry  
5 in the early embryo. *Developmental biology*. 241:47-58.
- 6 Motegi, F., S. Zonies, Y. Hao, A.A. Cuenca, E. Griffin, and G. Seydoux. 2011. Microtubules induce self-  
7 organization of polarized PAR domains in *Caenorhabditis elegans* zygotes. *Nature cell biology*.  
8 13:1361-1367.
- 9 Pacquelet, A., E. Zanin, C. Ashiono, and M. Gotta. 2008. PAR-6 levels are regulated by NOS-3 in a CUL-  
10 2 dependent manner in *Caenorhabditiselegans*. *Developmental biology*. 319:267-272.
- 11 Priess, J.R., and J.N. Thomson. 1987. Cellular interactions in early *C. elegans* embryos. *Cell*. 48:241-250.
- 12 Redemann, S., B. Weber, M. Moller, J.M. Verbavatz, A.A. Hyman, D. Baum, S. Prohaska, and T. Muller-  
13 Reichert. 2014. The segmentation of microtubules in electron tomograms using Amira. *Methods*  
14 *in molecular biology*. 1136:261-278.
- 15 Reich, J.D., L. Hubatsch, R. Illukkumbura, F. Peglion, T. Bland, N. Hirani, and N.W. Goehring. 2019.  
16 Regulated Activation of the PAR Polarity Network Ensures a Timely and Specific Response to  
17 Spatial Cues. *Current biology : CB*. 29:1911-1923 e1915.
- 18 Rodriguez, J., F. Peglion, J. Martin, L. Hubatsch, J. Reich, N. Hirani, A.G. Gubieda, J. Roffey, A.R.  
19 Fernandes, D. St Johnston, J. Ahringer, and N.W. Goehring. 2017. aPKC Cycles between  
20 Functionally Distinct PAR Protein Assemblies to Drive Cell Polarity. *Developmental cell*. 42:400-  
21 415 e409.
- 22 Rose, L., and P. Gonczy. 2014. Polarity establishment, asymmetric division and segregation of fate  
23 determinants in early *C. elegans* embryos. *WormBook : the online review of C. elegans*  
24 *biology*:1-43.
- 25 Sailer, A., A. Anneken, Y. Li, S. Lee, and E. Munro. 2015. Dynamic Opposition of Clustered Proteins  
26 Stabilizes Cortical Polarity in the *C. elegans* Zygote. *Developmental cell*. 35:131-142.
- 27 Schubert, C.M., R. Lin, C.J. de Vries, R.H. Plasterk, and J.R. Priess. 2000. MEX-5 and MEX-6 function to  
28 establish soma/germline asymmetry in early *C. elegans* embryos. *Molecular cell*. 5:671-682.
- 29 Seydoux, G., and M.A. Dunn. 1997. Transcriptionally repressed germ cells lack a subpopulation of  
30 phosphorylated RNA polymerase II in early embryos of *Caenorhabditis elegans* and *Drosophila*  
31 *melanogaster*. *Development*. 124:2191-2201.
- 32 Seydoux, G., C.C. Mello, J. Pettitt, W.B. Wood, J.R. Priess, and A. Fire. 1996. Repression of gene  
33 expression in the embryonic germ lineage of *C. elegans*. *Nature*. 382:713-716.
- 34 Singh, D., and C. Pohl. 2014. Coupling of rotational cortical flow, asymmetric midbody positioning, and  
35 spindle rotation mediates dorsoventral axis formation in *C. elegans*. *Developmental cell*. 28:253-  
36 267.
- 37 Sugioka, K., and B. Bowerman. 2018. Combinatorial Contact Cues Specify Cell Division Orientation by  
38 Directing Cortical Myosin Flows. *Developmental cell*. 46:257-270 e255.
- 39 Sugiyama, Y., A. Nishimura, and S. Ohno. 2008. Symmetrically dividing cell specific division axes  
40 alteration observed in proteasome depleted *C. elegans* embryo. *Mechanisms of development*.  
41 125:743-755.
- 42 Sulston, J.E., and H.R. Horvitz. 1977. Post-embryonic cell lineages of the nematode, *Caenorhabditis*  
43 *elegans*. *Developmental biology*. 56:110-156.
- 44 Sulston, J.E., E. Schierenberg, J.G. White, and J.N. Thomson. 1983. The embryonic cell lineage of the  
45 nematode *Caenorhabditis elegans*. *Developmental biology*. 100:64-119.
- 46 Tabuse, Y., Y. Izumi, F. Piano, K.J. Kemphues, J. Miwa, and S. Ohno. 1998. Atypical protein kinase C  
47 cooperates with PAR-3 to establish embryonic polarity in *Caenorhabditis elegans*. *Development*.  
48 125:3607-3614.
- 49 Wang, S.C., T.Y.F. Low, Y. Nishimura, L. Gole, W. Yu, and F. Motegi. 2017. Cortical forces and CDC-42  
50 control clustering of PAR proteins for *Caenorhabditis elegans* embryonic polarization. *Nature*  
51 *cell biology*. 19:988-995.

- 1 Wang, Y.C., Z. Khan, M. Kaschube, and E.F. Wieschaus. 2012. Differential positioning of adherens  
2 junctions is associated with initiation of epithelial folding. *Nature*. 484:390-393.
- 3 Zhang, Z., Y.W. Lim, P. Zhao, P. Kanchanawong, and F. Motegi. 2017. ImaEdge: a platform for the  
4 quantitative analysis of cortical proteins spatiotemporal dynamics during cell polarization.  
5 *Journal of cell science*.
- 6 Zhao, P., X. Teng, S.N. Tantirimudalige, M. Nishikawa, T. Wohland, Y. Toyama, and F. Motegi. 2019.  
7 Aurora-A Breaks Symmetry in Contractile Actomyosin Networks Independently of Its Role in  
8 Centrosome Maturation. *Developmental cell*. 48:631-645 e636.

9

10

11

1 **Figure 1. A schematic of *C. elegans* embryo polarization.**

2

3 Prior to polarization, a zygote localizes PAR-3, PAR-6, PKC-3, and CDC-42 throughout the cortex, and  
4 distributes PAR-1, PAR-2, and CHIN-1 in the cytoplasm. During symmetry breaking, the advective flows  
5 of cortical actomyosin networks translocate PAR-3, PAR-6, PKC-3, and CDC-42 to the anterior cortical  
6 domain. Active PKC-3 kinase at the cortex excludes PAR-1, PAR-2, and CHIN-1 from the anterior cortical  
7 domain, allowing them to localize onto the posterior cortical domain. Asymmetries in these PAR proteins  
8 in turn mediate the segregation of their effectors, including P-granules, MEX-5, PIE-1, and the mitotic  
9 spindle, during mitosis. In two-cell stage embryos, the anterior AB cell is destined to divide symmetrically,  
10 resulting in equal inheritance of PAR proteins and fate determinants by the two daughter cells, ABa and  
11 ABp. In contrast, the posterior P1 cell is engaged to undergo asymmetric cell division, resulting in  
12 unequal inheritance of PAR proteins and fate determinants by the two daughter cells, EMS and P2. All  
13 zygotes and embryos are oriented with the posterior to the right in this and all subsequent figures.

1 **Figure 2. The landscape of PAR polarity patterning in *C. elegans* zygotes.**  
2  
3 (A) A balance between PAR-2 and PAR-6 levels defines the cortical pattern of PAR proteins in zygotes.  
4 PAR-2 levels were modified by means of *gfp::par-2* transgene codon adaptation (codon-adaptation  
5 index (CAI) values from 0.26 to 0.60) and of temperature (either at 25°C or at 15°C). PAR-6 levels were  
6 changed by means of *mCherry::par-6* transgene and of *nos-3(q650)* or *lgl-1(dd21)* mutation.  
7 Representative zygotes during the maintenance phase are shown. Scale Bar, 5 µm.  
8 (B) Defining the limit of PAR protein segregation. Representative images of *par-2(RNAi)* zygotes, *par-*  
9 *2(partial RNAi: pRNAi)* zygotes wherein PAR-6 was predominant, *par-6(RNAi)* zygotes, and *par-6(pRNAi)*  
10 zygotes wherein PAR-2 was predominant are shown. Scale Bar, 5 µm.  
11 (C and D) The graphs depict the size of GFP::PAR-2 cortical domains in zygotes with various PAR  
12 balances. Height of green bars indicate the *gfp::par-2* transgene CAI. (C) Data represent mean ± s.d.  
13 from n = 9, 10, 12, 17, 10, 9, 9, 19, 9, 9, 12, 16, 8, 7, 11, 19, 98 zygotes. (D) Data represent mean ± s.d.  
14 from n = 9, 11, 8, 8, 4, 8, 7, 7, 6, 13, 5, 7, 6, 13, 7, 10, 194 zygotes. *p*-values; Mann–Whitney test.  
15 (E and F) The sizes of mCherry::PAR-6 and GFP::PAR-2 cortical domains in zygotes with various  
16 balances of PAR proteins. Black circles indicate zygotes on wild-type background. Light purple (E) and  
17 light green (F) indicate zygotes on *lgl-1(dd21)* and *nos-3(q650)* backgrounds, respectively. Dark purple  
18 (E) and dark green (F) denote zygotes subjected to *par-2(pRNAi)* and *par-6(pRNAi)* treatments,  
19 respectively.

1 **Figure 3. A combinatorial network of two reciprocal exclusion pathways ensures cortical polarization.**  
2  
3 (A) The polarized distribution of PAR-3 is not required for the maintenance of polarized PAR-6 domain.  
4 Representative images of mCherry::PAR-6, GFP::PAR-2, PAR-1, and PAR-3 in control zygotes and *par-*  
5 *6(pRNAi)* zygotes wherein PAR-2 was predominant are shown. Arrowheads show the edges of  
6 mCherry::PAR-6 cortical domain. Scale Bar, 5  $\mu$ m.  
7 (B-E) The graphs depict the ratios of the cortical distribution of mCherry::PAR-6 (B), GFP::PAR-2 (C),  
8 PAR-1 (D), and PAR-3 (E) between the anterior and the posterior cortical domains in control and *par-*  
9 *6(pRNAi)* zygotes wherein PAR-2 was predominant. Data present mean  $\pm$  s.d. from n = 19, 11, 19, 11,  
10 20, 11, 6, 6 zygotes.  
11 (F) CHIN-1 is essential for the cortical polarization of PAR-6 in zygotes where PAR-2 is predominant.  
12 Representative images of mCherry::PAR-6 and GFP::PAR-2 in zygotes under control, *par-6(pRNAi)*, *par-*  
13 *6(pRNAi);chin-1(RNAi)*, and *chin-1(RNAi)* conditions are shown. *chin-1(RNAi)* caused depolarization of  
14 mCherry::PAR-6, resulting in the weak enrichment of mCherry::PAR-6 throughout the cortex. Scale Bar,  
15 5  $\mu$ m.  
16 (G) The graph shows the size of cortical mCherry::PAR-6 domain in zygotes under conditions shown in  
17 (F). Data present mean  $\pm$  s.d. from n = 16, 17, 30, 6 zygotes.  
18 (B-E and G) *p*-values; Mann–Whitney test.  
19

1 **Figure 4. Modelling of a combinatorial network of two reciprocal cortical-exclusion pathways.**

2

3 (A) Schematic view of a model of cortical PAR polarity patterning. A mutually-exclusive pathway between  
4  $A_2$  (PAR-3, PAR-6, and PKC-3) and  $P_2$  (PAR-1 and PAR-2) is complemented by another mutually-  
5 exclusive pathway between  $A_1$  (CDC-42, PAR-6, and PKC-3) and  $P_1$  (CHIN-1). This scheme includes four  
6 inhibitory interactions (from  $A_1$  to  $P_2$ , from  $P_2$  to  $A_2$ , from  $A_1$  to  $P_1$ , and from  $P_1$  to  $A_1$ ) and one positive  
7 interaction (from  $A_2$  to  $A_1$ ).

8 (B-I) Steady-state analysis of the model equations in zygotes under following conditions. Predicted  
9 distributions of four PAR species at the cortex along the anteroposterior axis are shown. (B) wild-type,  
10 (C) No  $A_1$  (*par-6(RNAi)*), (D) No  $P_2$  (*par-2(pRNAi)*), (E) No  $P_1$  (*par-6(pRNAi)*), (F) Lower  $P_2$  (*par-2(pRNAi)*),  
11 (G) Lower  $A_1$  (*par-6(pRNAi)*), (H) Higher  $P_2$  (GFP::*PAR-2<sup>CAI = 0.60</sup>*, *par-6(pRNAi)*), (I) Higher  $P_2$  and No  $P_1$   
12 (GFP::*PAR-2<sup>CAI = 0.60</sup>*, *par-6(pRNAi)*; *chin-1(RNAi)*).

13

1 **Figure 5. Fate determinants can be segregated independently of reciprocal cortical exclusion between**  
2 **PAR proteins.**

3

4 (A) Representative images of the distribution of GFP::PAR-2 (green) and the cytoplasmic factors  
5 including P-granules (magenta), MEX-5 (magenta), and the position of a cleavage furrow (white  
6 arrowheads) in zygotes where the balance between PAR-6 and PAR-2 were manipulated. These zygotes  
7 were classified into three groups: Class I zygotes established the polarized distributions of GFP::PAR-2  
8 and the cytoplasmic factors. Class II zygotes exhibited the polarized distribution of the cytoplasmic  
9 factors, whereas GFP::PAR-2 localized throughout the cortex. Class III zygotes showed uniform  
10 distributions of GFP::PAR-2 and the cytoplasmic factors. Scale Bar, 5  $\mu$ m.

11 (B-D) The graphs depict the enrichment of P-granules (B) and MEX-5 (C) in the anterior and the posterior  
12 cytoplasm, and the position of cleavage furrows (D) in zygotes described in (A).

13 (E-G) The graphs depict the percentage of three phenotypic classes shown in (B-D).

14 (B-G) The number of samples are indicated in the graphs. Height of green bars indicate the CAI values  
15 of *gfp::par-2* transgene.



1 **Figure 6. The balance between PAR proteins defines the choice between the two division modes.**

2

3 (A) Changes in the levels of PAR proteins are sufficient to reverse the choice between the two cell division  
4 modes in two-cell stage embryos. Representative time-lapse images of embryos expressing  
5 mCherry::PAR-6 (magenta) and either GFP::PAR-2<sup>CAI = 0.40</sup> or GFP::PAR-2<sup>CAI = 0.60</sup> (green) under control,  
6 *par-6(pRNAi)*, *par-6(RNAi)*, and *cdc-37(RNAi)* conditions are shown. Arrowheads show the boundary  
7 between mCherry::PAR-6 and GFP::PAR-2 cortical domains in AB cells. The times stated are with respect  
8 to the completion of cytokinesis in zygotes. Scale Bar, 5  $\mu$ m.

9 (B) The graphs depict the percentage of AB and P1 cells that underwent either equal or unequal  
10 inheritance of GFP::PAR-2 under control, *par-6(pRNAi)*, and *cdc-37(RNAi)* conditions.

11 (C) Induced asymmetry in cortical PAR proteins mediates the segregation of fate determinants in AB  
12 cells. Representative images of the distributions of PAR-1, PAR-3, MEX-5, and PIE-1 in embryos  
13 expressing both mCherry::PAR-6 (magenta) and GFP::PAR-2<sup>CAI = 0.60</sup> (green) under control, *par-6(pRNAi)*,  
14 and *cdc-37(RNAi)* conditions are shown. Scale Bar, 5  $\mu$ m.

15 (D) The graphs depict the percentage of AB cells that segregated PAR-1, PAR-3, MEX-5, and PIE-1  
16 between their daughter cells.

17 (B and D) The number of cells observed is indicated in the graphs.

18

1 **Figure 7. The choice between the two division modes is independent of asymmetries in fate determinants**  
2 **between the sister cells.**

3

4 (A) Unequal inheritance of fate determinants and asymmetries in cell size and cell-cycle progression are  
5 not required for determining the two modes of cell division. Representative time-lapse images of embryos  
6 expressing either GFP::PAR-2<sup>CAI = 0.40</sup> or GFP::PAR-2<sup>CAI = 0.26</sup> (green) under control and *cye-1(RNAi)*  
7 conditions are shown. Arrowheads show the edges of cortical GFP::PAR-2 domains. The times stated  
8 are with respect to the completion of cytokinesis in zygotes. Scale Bar, 5  $\mu$ m.

9 (B) The graphs depict the percentage of AB and P1 cells that underwent either equal or unequal  
10 inheritance of GFP::PAR-2 between their daughter cells.

11 (C) Induced asymmetry in cortical PAR proteins in two-cell stage *cye-1(RNAi)* embryos mediates unequal  
12 inheritance of fate determinants. Representative images of the distributions of PAR-3, PGL-1-positive P-  
13 granules, PIE-1, and MEX-5 (magenta) in embryos expressing GFP::PAR-2<sup>CAI = 0.40</sup> (green) under control  
14 and *cye-1(RNAi)* conditions are shown. Scale Bar, 5  $\mu$ m.

15 (D) The graphs depict the percentage of the sister cells in two-cell stage embryos that segregated PAR-  
16 3, P-granules, PIE-1, and MEX-5 during the second cell division.

17 (B and D) The number of cells observed is indicated in the graphs.

18

1 **Figure 8. Modelling of a combinatorial PAR network in two-cell stage embryos.**

2

3 (A) Schematic view of PAR proteins inheritance in a wild-type embryo. The four PAR species at the steady  
4 state in a zygote are partitioned at the cleavage furrow, resulting in unequal inheritance of these PAR  
5 species into AB and P1 cells.

6 (B and C) Steady-state analysis of the PAR network model in two-cell stage wild-type embryo. (B)  
7 Schematic of PAR-6 (red) and PAR-2 (green) distribution in an AB cell and a P1 cell. (C) Predicted  
8 distributions of the PAR species at the cortex along the anteroposterior axis in an AB cell (left) and a P1  
9 cell (right).

10 (D and E) Steady-state analysis of the PAR network model in two-cell stage embryo with a predominance  
11 of PAR-2. (D) Schematic of PAR-6 (red) and PAR-2 (green) distribution in an AB cell and a P1 cell. (E)  
12 Predicted distributions of the PAR species at the cortex along the anteroposterior axis in an AB cell (left)  
13 and a P1 cell (right).

14 (C and E) Cortical concentration of each PAR species is normalized between AB and P1 cells in the  
15 same embryo.

16 (F-H) Steady-state analysis of the PAR network model in two-cell stage *cye-1(RNAi)* embryo. (F)  
17 Schematic of PAR-6 (red) and PAR-2 (green) distribution in a *cye-1(RNAi)* embryo. (G and H) Predicted  
18 distributions of the PAR species at the cortex along the anteroposterior axis in the daughter cells  
19 expressing higher levels of PAR-2 (G) or lower level of PAR-2 (H). Cortical concentration of each PAR  
20 species is normalized between these two conditions.

21

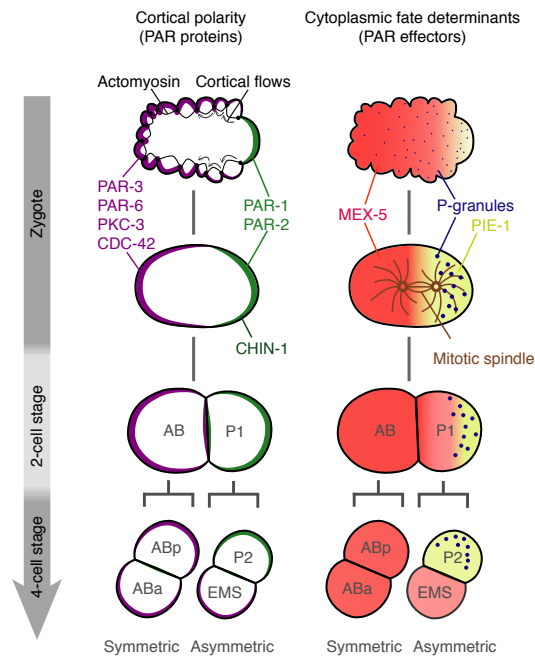

**Figure 1**

Binary decision between asymmetric and symmetric cell division is defined by the balance of PAR proteins in *C. elegans* embryos  
 Yen Wei Lim, Fu-Lai Wen, Prabhat Shankar, Tatsuo Shibata, Fumio Motegi

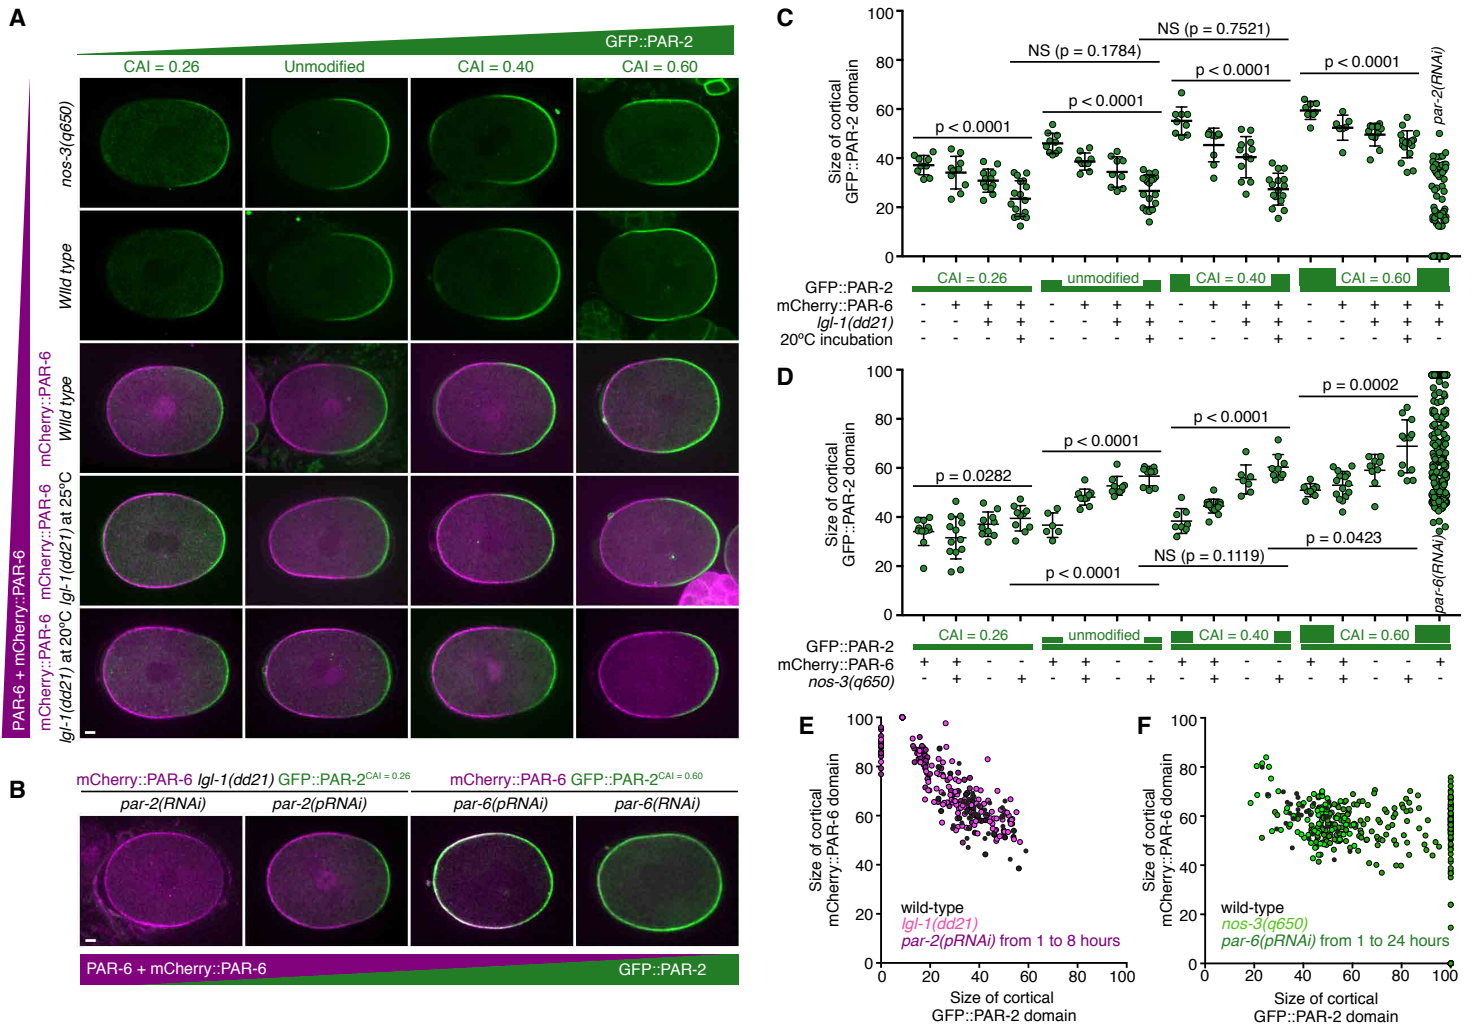

**Figure 2**

Binary decision between asymmetric and symmetric cell division is defined by the balance of PAR proteins in *C. elegans* embryos  
Yen Wei Lim, Fu-Lai Wen, Prabhat Shankar, Tatsuo Shibata, Fumio Motegi

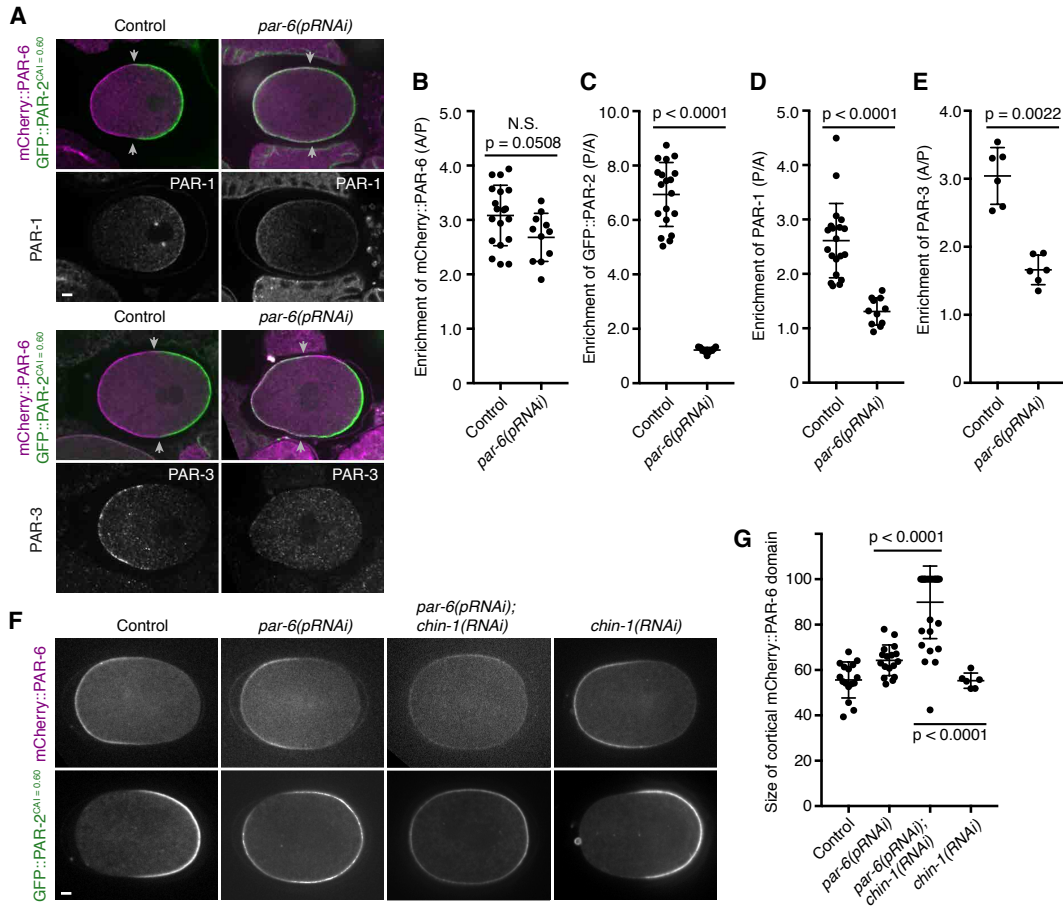

**Figure 3**

Binary decision between asymmetric and symmetric cell division is defined by the balance of PAR proteins in *C. elegans* embryos  
 Yen Wei Lim, Fu-Lai Wen, Prabhat Shankar, Tatsuo Shibata, Fumio Motegi

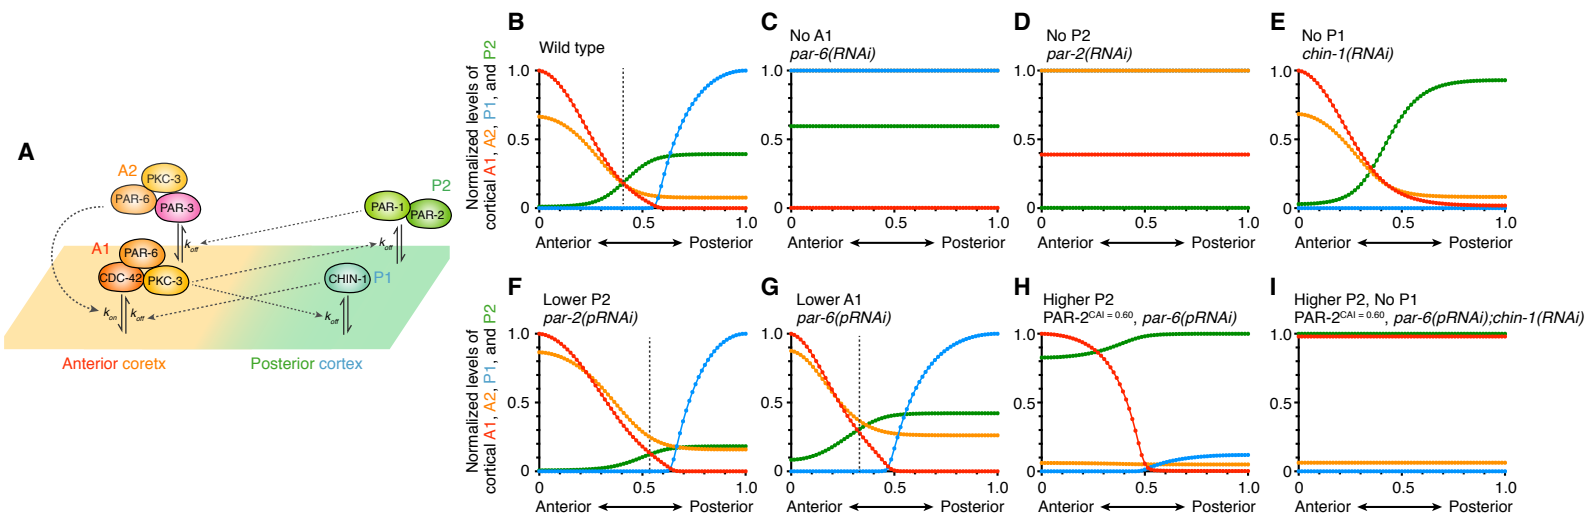

**Figure 4**

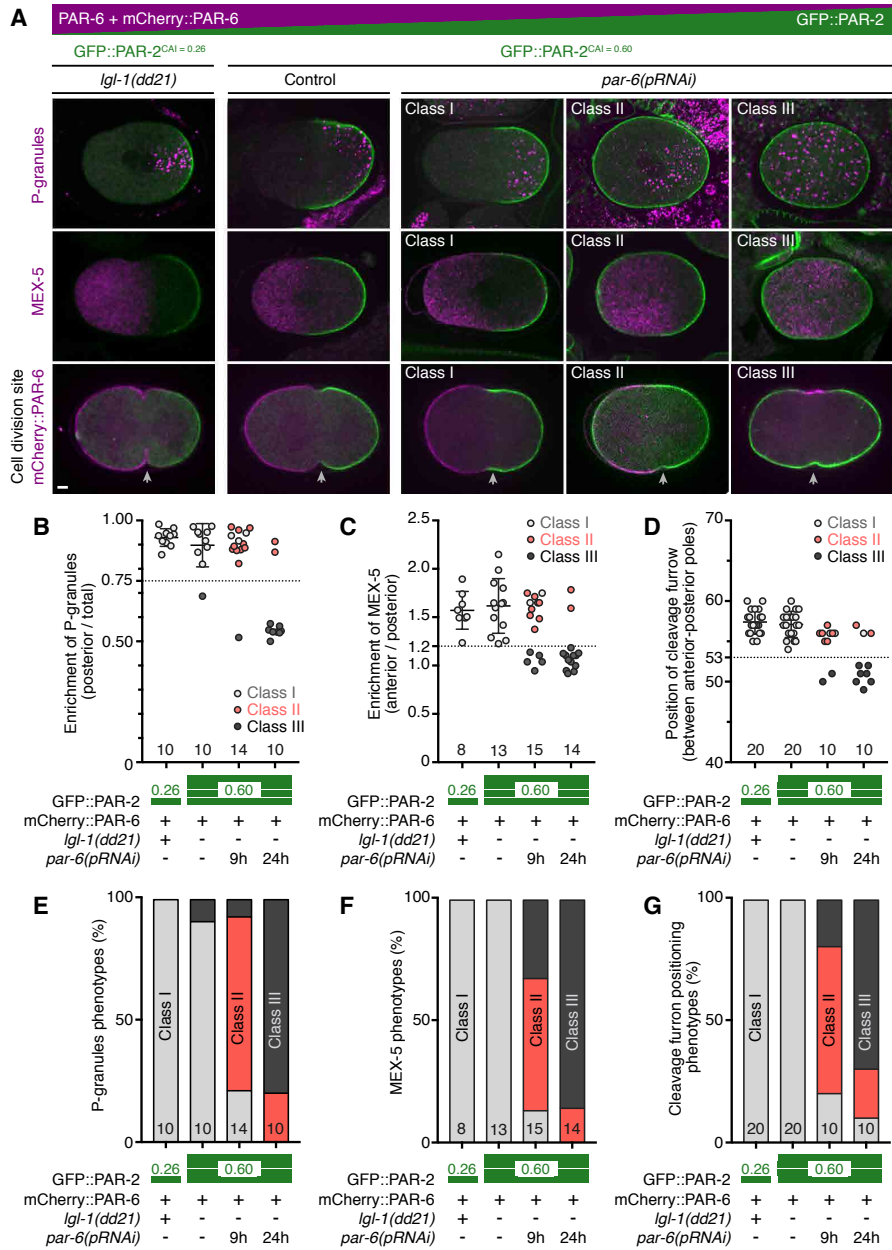

**Figure 5**

Binary decision between asymmetric and symmetric cell division is defined by the balance of PAR proteins in *C. elegans* embryos  
 Yen Wei Lim, Fu-Lai Wen, Prabhat Shankar, Tatsuo Shibata, Fumio Motegi



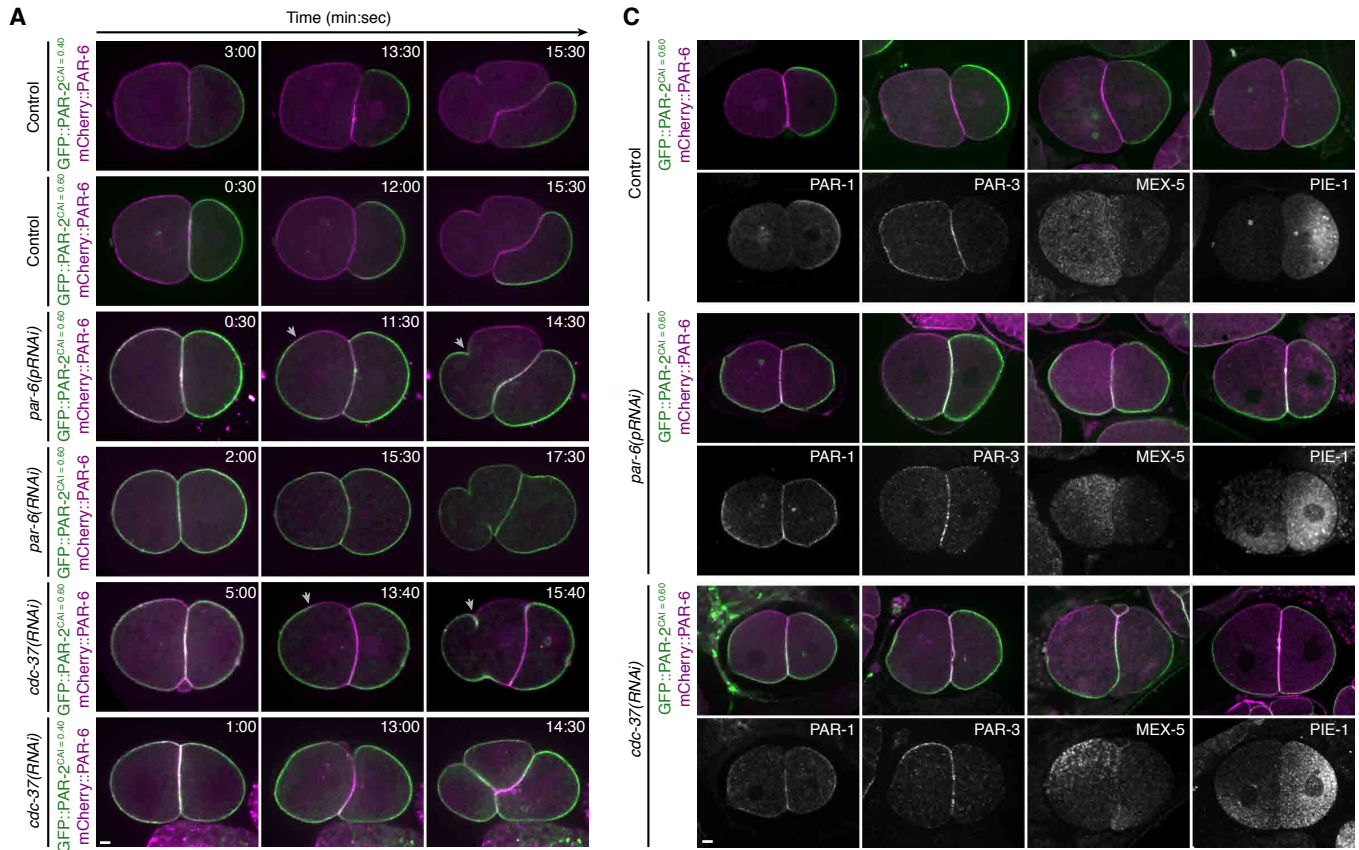

**Figure 6**

Binary decision between asymmetric and symmetric cell division is defined by the balance of PAR proteins in *C. elegans* embryos  
 Yen Wei Lim, Fu-Lai Wen, Prabhat Shankar, Tatsuo Shibata, Fumio Motegi

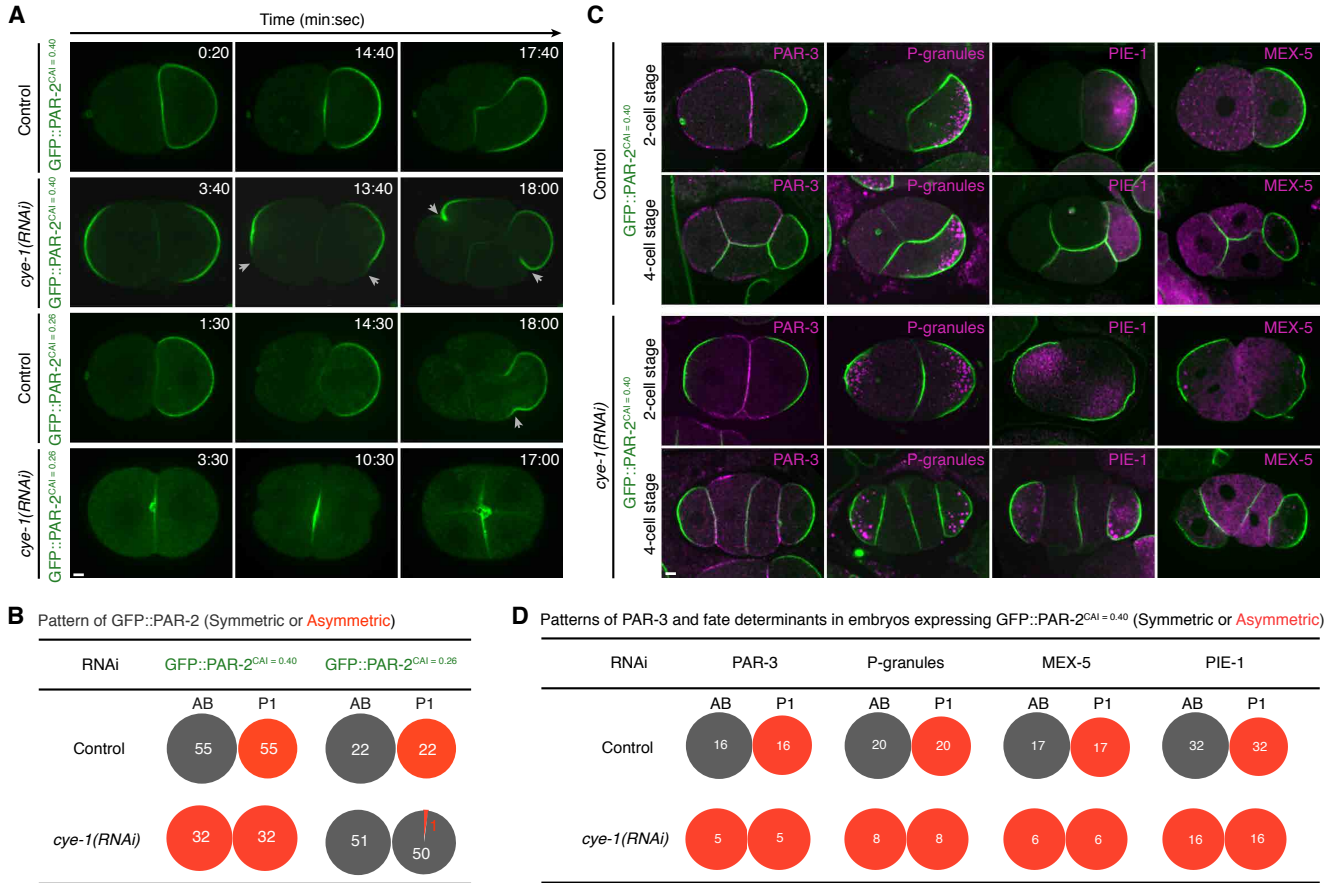

**Figure 7**

Binary decision between asymmetric and symmetric cell division is defined by the balance of PAR proteins in *C. elegans* embryos  
 Yen Wei Lim, Fu-Lai Wen, Prabhat Shankar, Tatsuo Shibata, Fumio Motegi

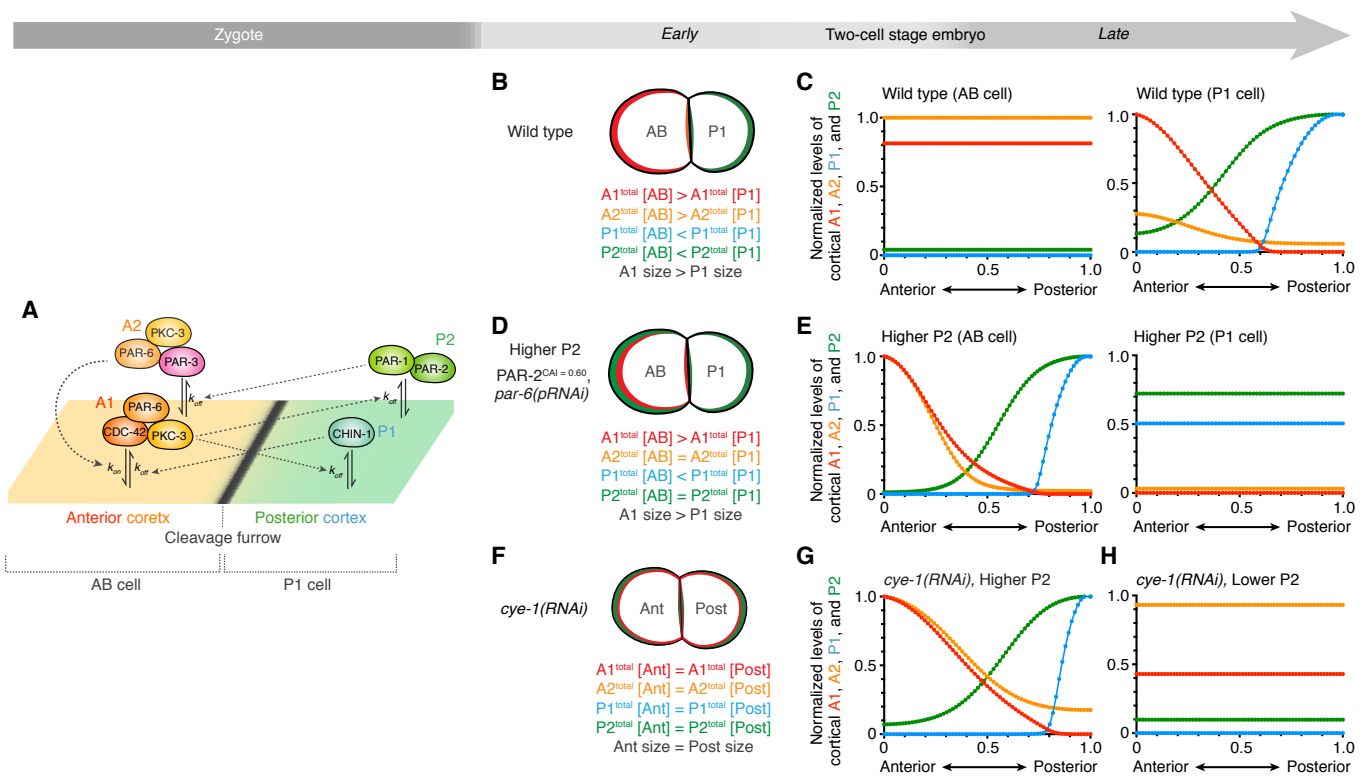

**Figure 8**
